# Supplementary material for: Comparison of Volatile and Nonvolatile Metabolites in Black Tea under Four Second-Drying Methods Using Widely Targeted Metabolomics
Source: MDPI journal article supplement (doi:10.3390/foods13010144), 2023-12-31
Supplement: s1 [file s1]

**Table S1.** List of the volatile compounds in the black tea samples.

| No. | Compounds                                           | Peak area  |            |            |            |             |            |             |            |            |            |            |             |
|-----|-----------------------------------------------------|------------|------------|------------|------------|-------------|------------|-------------|------------|------------|------------|------------|-------------|
|     |                                                     | CRSD-1     | CRSD-2     | CRSD-3     | RLSD-1     | RLSD-2      | RLSD-3     | CLSD-1      | CLSD-2     | CLSD-3     | HASD-1     | HASD-2     | HASD-3      |
| 1   | 1H-Tetrazole-1,5-diamine                            | 27503.435  | 24347.0625 | 21190.69   | 19034.734  | 19799.05    | 24067.136  | 26489.46    | 20978.231  | 23941.486  | 29260.407  | 21902.276  | 31129.323   |
| 2   | Methanethiol                                        | 210508.243 | 197152.054 | 183754.941 | 156663.709 | 171216.363  | 156751.398 | 167006.688  | 158576.02  | 157614.181 | 192323.355 | 165278.11  | 199960.56   |
| 3   | Propanal                                            | 713387.578 | 729220.745 | 673157.279 | 615565.314 | 718494.127  | 627300.107 | 551846.82   | 559049.206 | 587454.168 | 592762.661 | 571633.454 | 608785.45   |
| 4   | Sesquicineole                                       | 125874.808 | 111385.384 | 96895.96   | 120075.468 | 107006.007  | 90042.642  | 42783.784   | 54568.061  | 66352.338  | 83205.265  | 76977.544  | 80091.4045  |
| 5   | Propanal, 2-methyl-                                 | 11380372.3 | 11400767.3 | 11552686.8 | 9840504.62 | 10612909.2  | 10242418   | 13269087.7  | 13559013.2 | 13658328.4 | 15701097.6 | 14167184.5 | 14752583.3  |
| 6   | Acetic acid, methyl ester                           | 53787.504  | 50728.714  | 58490.812  | nd         | nd          | nd         | 49248.585   | 51597.25   | 53945.915  | 271623.905 | 265277.266 | 261723.575  |
| 7   | 2-Propenal                                          | 554161.145 | 545738.641 | 552352.643 | 461564.942 | 500741.082  | 478407.739 | 429780.219  | 453700.906 | 442223.052 | 427330.056 | 361386.823 | 397096.7    |
| 8   | Furan, tetrahydro-2-methyl-                         | 83821.103  | 84181.0235 | 84540.944  | 157227.288 | 154228.24   | 151229.192 | 86941.378   | 91726.692  | 82156.064  | nd         | nd         | nd          |
| 9   | Butanal                                             | 445357.543 | 418839.826 | 412428.3   | 256282.881 | 324098.54   | 263653.3   | 357298.081  | 342338.169 | 345146.387 | 532941.091 | 516248.066 | 626287.996  |
| 10  | 4-Hydroxy-2,6,6-trimethylcyclohex-1-enecarbaldehyde | 123843.745 | 125021.49  | 116890.588 | 140811.045 | 110898.306  | 80985.567  | 107559.477  | 122052.595 | 123779.345 | 92104.826  | 96791.74   | 119641.654  |
|     |                                                     |            |            |            |            |             |            |             |            |            |            |            |             |
| 11  | Ethyl Acetate                                       | 126548.395 | 106673.661 | 125771.041 | 262799.69  | 236983.869  | 250882.541 | 126061.878  | 143753.477 | 141685.909 | 115689.385 | 116908.399 | 113891.936  |
| 12  | Phthalic acid, heptyl tridec-2-yn-1-yl ester        | 106407.033 | 99576.845  | 92746.657  | 215453.873 | 173329.4655 | 131205.058 | 179156.3795 | 165997.094 | 192315.665 | 110203.879 | 182110.924 | 146157.4015 |
|     |                                                     |            |            |            |            |             |            |             |            |            |            |            |             |
| 13  | Methyl Alcohol                                      | 934708.632 | 931154.037 | 882425.581 | 442453.75  | 454405.539  | 442772.05  | 601040.948  | 599697.487 | 563451.877 | 2140830.34 | 2131946.63 | 2024102.07  |
| 14  | 2-Butanone                                          | 469202.143 | 450538.803 | 484605.326 | 427081.086 | 453317.368  | 424805.956 | 506151.443  | 489814.258 | 484276.729 | 679068.264 | 638059.107 | 711152.455  |
| 15  | cis-2-(2-Pentenyl)furan                             | 143837.491 | 167940.085 | 119734.897 | nd         | nd          | nd         | nd          | nd         | nd         | nd         | nd         | nd          |
| 16  | 1H-Indole, 1-methyl-2-phenyl-                       | 21079.613  | 19680.919  | 18282.225  | nd         | nd          | nd         | 17283.952   | 14557.484  | 15920.718  | 13781.334  | 18048.6075 | 15914.97075 |
| 17  | Butanal, 3-methyl-                                  | 22251899   | 21635988   | 21708437.7 | 17556604.8 | 20839074.3  | 18972296.9 | 21935159.8  | 21025218.1 | 22706046   | 21970376.4 | 19555740.1 | 21616891.1  |
| 18  | Ethanol                                             | 2990375.82 | 2721955.53 | 2746319.45 | 3029855.99 | 2767202.7   | 2791225.35 | 2824926.06  | 2731693.44 | 2729203.63 | 2569954.22 | 2456238.87 | 2328336.93  |
| 19  | Furan, 2-ethyl-                                     | 5778769.44 | 6658343.84 | 6006364.6  | 3457107.37 | 3923089.51  | 4634338.06 | 4795217.36  | 3962742.35 | 3735322.5  | 3931563.54 | 3512349    | 3122369.11  |
| 20  | 1,3-Octadiene                                       | 42254.637  | 45218.852  | 39290.422  | nd         | nd          | nd         | 55068.999   | 47416.672  | 51242.8355 | 31073.873  | 35575.848  | 33324.8605  |

|    |                                                |            |            |             |             |             |             |             |             |             |            |            |             |
|----|------------------------------------------------|------------|------------|-------------|-------------|-------------|-------------|-------------|-------------|-------------|------------|------------|-------------|
| 21 | Sulfurous acid, 2-pentyl pentyl ester          | 60797.649  | 55721.517  | 57851.055   | 57843.869   | 66236.789   | 68049.837   | 67669.038   | 55994.396   | 60482.969   | 52687.711  | 41250.416  | 45039.395   |
| 22 | 3-Ethyl-3-methyl-2-pentanol                    | 62157.074  | 57525.283  | 60479.695   | 52349.8265  | 57969.112   | 46730.541   | 63567.891   | 65604.089   | 62304.218   | 65770.324  | 50448.577  | 59803.201   |
| 23 | 1,3-Cyclopentadiene, 5-(1,1-dimethylethyl)-    | 187974.869 | 232578.656 | 210276.7625 | 106246.417  | 132688.559  | 117580.98   | 140777.397  | 127467.416  | 121011.578  | 82294.48   | 61006.652  | 71650.566   |
| 24 | Oxalic acid, monoamide, n-propyl, heptyl ester | 753886.401 | 807466.826 | 677011.238  | 600413.938  | 625924.855  | 641525.91   | 591700.04   | 614603.874  | 631243.269  | 670020.748 | 649368.453 | 681315.979  |
| 25 | Pentanal                                       | 11948983.3 | 13155149.6 | 9999693.63  | 9849302.89  | 10196384.4  | 10907685.8  | 10456255.1  | 9856763.35  | 10148610.7  | 6321184.15 | 5208658.63 | 6220399.78  |
| 26 | Hexyl octyl ether                              | 894571.658 | 1075935.44 | 713207.876  | 653119.713  | 630059.92   | 650426.945  | 371587.826  | 447585.929  | 409586.8775 | 515737.127 | 531909.718 | 720657.519  |
| 27 | Butane, 1-methoxy-3-methyl-                    | 577313.692 | 730794.167 | 662947.387  | 194731.687  | 210304.895  | 221467.736  | 141406.825  | 162680.1915 | 183953.558  | 563637.999 | 565594.377 | 550754.06   |
| 28 | 1,5-Heptadiene, 2,6-dimethyl-                  | 49350.598  | 58146.378  | 53939.832   | nd          | nd          | nd          | nd          | nd          | nd          | 47723.753  | 52942.2295 | 58160.706   |
| 29 | 2H-Pyran, 3,4-dihydro-6-methyl-                | 42990.075  | 43181.93   | 44685.374   | 34449.045   | 40716.43    | 37100.308   | 35313.251   | 45586.067   | 42711.049   | 66646.378  | 65543.854  | 61151.918   |
| 30 | 3-Pentanone, 2-methyl-                         | 40875.41   | 42808.875  | 40591.982   | 53170.888   | 55077.717   | 57547.371   | 40240.789   | 35920.957   | 36441.155   | 46786.717  | 41530.33   | 44158.5235  |
| 31 | Pentanal, 2-methyl-                            | 193926.885 | 217889.383 | 198476.785  | 139832.459  | 149767.086  | 143171.787  | 225286.233  | 235318.804  | 230282.292  | 404902.895 | 337870.926 | 347147.069  |
| 32 | Acetic acid                                    | 1697201.71 | 1902598.04 | 1865848.72  | 1256227.79  | 1528836.7   | 1392532.245 | 1683367.83  | 1670532.12  | 1657696.41  | 1961014.68 | 1323134.89 | 1642074.785 |
| 33 | 1-Penten-3-one                                 | 3242102.1  | 3183747.12 | 3002072.47  | 2708787.73  | 2934118.6   | 2762353.48  | 2354690.91  | 2358891.53  | 2242006.51  | 2111320.23 | 1850040.68 | 2097836.4   |
| 34 | Phthalic acid, butyl hex-3-yl ester            | 2494528    | 2653863.07 | 2574195.535 | 2318525.18  | 1761924.29  | 1913391.15  | 2424302.66  | 2133529.21  | 1842755.76  | 1696869.19 | 1688838.75 | 1734140.32  |
| 35 | 2,3-Pentanedione                               | 218687.759 | 238093.278 | 227142.7    | 177939.679  | 194783.708  | 204337.756  | 221170.06   | 225266.567  | 235426.433  | 489154.057 | 476862.159 | 438089.381  |
| 36 | Sulfurous acid, hexyl nonyl ester              | 174532.907 | 208047.887 | 173293.944  | nd          | nd          | nd          | 106183.3185 | 113406.52   | 98960.117   | 68737.451  | 47379.8    | 58058.6255  |
| 37 | Pyridine, 3-(trifluoromethyl)-                 | 182716.272 | 184691.311 | 188023.598  | 159830.121  | 183429.209  | 176426.14   | 249507.802  | 252297.051  | 254825.014  | 219967.023 | 193866.087 | 178460.257  |
| 38 | 1-Penten-3-one, 2-methyl-                      | 840029.016 | 984111.537 | 912070.2765 | 757266.876  | 796789.897  | 702335.854  | 869487.686  | 804370.677  | 856008.729  | 631639.132 | 494072.169 | 562855.6505 |
| 39 | Acetic acid, butyl ester                       | 57900.151  | 54611.529  | 57073.825   | 45759.111   | 56674.842   | 57368.898   | 48372.89    | 51364.001   | 44584.976   | 61412.327  | 50933.489  | 51395.2     |
| 40 | Hexanal                                        | 20902832.7 | 19714244.3 | 19161996.5  | 16441617.7  | 17515548.5  | 18457180    | 14772948.7  | 14699322.3  | 14118809.8  | 16086484   | 14470785.9 | 13479228.4  |
| 41 | Eugenol                                        | 1207281.88 | 1007566.97 | 1107424.425 | 846304.4485 | 699577.2178 | 552849.987  | 458520.6015 | 451930.69   | 465110.513  | 553589.679 | 494677.818 | 524133.7485 |
| 42 | Pentadecanoic acid, 3-methylbutyl ester        | 283085.041 | 319513.231 | 243317.104  | 117054.3835 | 99587.859   | 134520.908  | 179415.553  | 166800.1995 | 154184.846  | nd         | nd         | nd          |
| 43 | Sulfurous acid, butyl nonyl ester              | 69810.413  | 82509.758  | 76160.0855  | 27798.4     | 23938.902   | 31657.898   | 45045.4685  | 50250.044   | 39840.893   | 28654.909  | 18284.858  | 23469.8835  |
| 44 | 2-Propyl-1-pentanol                            | 7928024.04 | 8103373.16 | 8015698.6   | 10838394.2  | 9499747.25  | 8552775.08  | 9918080.87  | 7321761.52  | 8619921.195 | 7825067.04 | 7140155.53 | 8757714.17  |

|    |                                                            |             |             |             |             |             |            |             |             |             |            |            |             |
|----|------------------------------------------------------------|-------------|-------------|-------------|-------------|-------------|------------|-------------|-------------|-------------|------------|------------|-------------|
| 45 | 2,4,4-Trimethyl-3-(3-methylbutyl)cyclohex-2-enone          | 87561.773   | 98193.421   | 92877.597   | 87653.163   | 93691.8145  | 99730.466  | 119292.005  | 112623.863  | 115957.934  | 94284.48   | 93135.425  | 71527.313   |
| 46 | Trimethylamine, 1-cyclohexyl-                              | 69471.27925 | 78028.0305  | 60914.528   | 133080.344  | 103096.458  | 118088.401 | nd          | nd          | nd          | 68113.707  | 56725.221  | 62419.464   |
| 47 | Pentanoic acid, 2-methyl-, methyl ester                    | 5292547.848 | 5929763.125 | 4655332.57  | 3485551.31  | 3215784.02  | 3422599.35 | 4010424.35  | 3592865.54  | 3489712.03  | 3391206.27 | 2994728.43 | 3192967.35  |
| 48 | Di-epi-1,10-cubenol                                        | 21961.125   | 24602.93    | 19319.32    | nd          | nd          | nd         | nd          | nd          | nd          | nd         | nd         | nd          |
| 49 | Carbonic acid, 2-ethylhexyl nonyl ester                    | 1070055.78  | 969958.933  | 1020007.357 | 216650.282  | 207747.12   | 225553.444 | 444617.645  | 400567.1935 | 356516.742  | 258422.208 | 191430.516 | 224926.362  |
| 50 | 2,7-Octadien-1-ol                                          | 825563.2863 | 924557.0175 | 726569.555  | 653573.479  | 801024.352  | 718361.279 | 890730.659  | 915952.238  | 906548.983  | 1038119.02 | 892338.154 | 965228.587  |
| 51 | 1-Penten-3-ol                                              | 30309400.5  | 30388613.7  | 32280704    | 12575965.4  | 13064697    | 12925059.7 | 11886976.2  | 13205041.6  | 12788792    | 31044196.7 | 30101127.7 | 28229797.2  |
| 52 | 2-Propenoic acid, butyl ester                              | 1181760.3   | 1347016.92  | 1071836.74  | 665025.868  | 626797.874  | 703253.862 | 611010.067  | 691771.759  | 594922.174  | 1184245.11 | 1002721.54 | 1123852.39  |
| 53 | 1H-Pyrrole-2,5-dione, 3-ethyl-4-methyl-                    | 418007.6038 | 465094.8085 | 370920.399  | 331995.383  | 309247.809  | 286835.717 | 451991.341  | 351028.115  | 370865.797  | 271593.991 | 250433.574 | 261013.7825 |
| 54 | Cyclohexanol, 3,3,5-trimethyl-                             | 12015.593   | 14422.747   | 15326.731   | 7640.543    | 6824.6195   | 6008.696   | 5676.697    | 8876.271    | 7276.484    | 11511.548  | 12418.095  | 13324.642   |
| 55 | Heptanal                                                   | 8498616.58  | 7972833.72  | 7307498.77  | 4816380.29  | 6474429.61  | 5574717.64 | 6062143.24  | 5522424.94  | 5856467.36  | 3685587.49 | 3257585.35 | 4006036.28  |
| 56 | 1-Hexene, 2,4,4-triethyl-                                  | 297747.6878 | 264232.0025 | 331263.373  | 240398.756  | 244351.0105 | 248303.265 | 268081.334  | 215066.737  | 241574.0355 | 341202.239 | 288883.412 | 341359.611  |
| 57 | Pyridinium, dinitromethylide-                              | 393387.3485 | 395955.654  | 390819.043  | 399335.219  | 450465.229  | 424900.224 | 342311.1715 | 361606.236  | 323016.107  | 339960.507 | 286040.283 | 337770.626  |
| 58 | 1,3a-Ethano(1H)inden-4-ol, octahydro-2,2,4,7a-tetramethyl- | 132598.392  | 147315.046  | 117881.738  | 109509.2685 | 114486.541  | 104531.996 | 102955.309  | 98125.528   | 88450.392   | 98222.767  | 87402.795  | 92812.781   |
| 59 | 2-Propenal, 3-phenyl-                                      | 182438.202  | 223560.98   | 202999.591  | 380328.622  | 318000.6175 | 255672.613 | 218076.7155 | 203447.413  | 232706.018  | 352529.704 | 310984.549 | 331757.1265 |
| 60 | 2-Decenal, (E)-                                            | 1171852.4   | 1050139.087 | 928425.774  | 1592733.03  | 1366567.99  | 1072459.28 | 1417483.67  | 1290114.14  | 1373364.42  | 1898239.29 | 1337140.35 | 1617689.82  |
| 61 | 2-Hexenal, (E)-                                            | 74651122.5  | 82171425.1  | 75579841.3  | 24667935    | 25859386.1  | 24673762.6 | 31914115.9  | 28040081.3  | 28631773.7  | 54573310.1 | 52549417   | 55202971.6  |
| 62 | Carbonic acid, dimethyl ester                              | 115884.76   | 108991.093  | 110436.149  | 134308.093  | 178172.312  | 150855.488 | 121113.005  | 185691.076  | 163647.359  | 325495.744 | 321443.279 | 261617.967  |
| 63 | 2-Propanol, 1-(2-butoxy-1-methylethoxy)-                   | 296056.538  | 300615.518  | 292439.71   | 520581.538  | 355560.234  | 422992.794 | 513960.299  | 514219.266  | 437941.305  | 445453.703 | 516264.371 | 359052.777  |
| 64 | 2-Isopropenyl-5-methylhex-4-enal                           | 68889.174   | 61429.509   | 53969.844   | 53178.381   | 57711.966   | 55445.1735 | 78004.132   | 117234.852  | 93775.227   | 181939.648 | 141898.492 | 153088.041  |
| 65 | 2-Undecene, 3-methyl-, (E)-                                | 492800.965  | 558404.606  | 525602.7855 | 158713.311  | 153450.468  | 163976.154 | 203775.72   | 214610.788  | 192940.652  | 124151.905 | 112615.612 | 118383.7585 |
| 66 | 3,6-Nonadien-1-ol, (E,Z)-                                  | 574635.761  | 641860.526  | 608248.1435 | 281503.193  | 307947.148  | 298206.959 | 309417.816  | 278115.653  | 262884.112  | 384619.189 | 401518.081 | 479549.379  |

|    |                                                            |            |             |             |             |            |             |             |            |            |            |            |             |
|----|------------------------------------------------------------|------------|-------------|-------------|-------------|------------|-------------|-------------|------------|------------|------------|------------|-------------|
| 67 | Succinic acid, tridec-2-yn-1-yl tetrahydrofurfuryl ester   | 65655.457  | 81777.156   | 73716.3065  | 40341.0605  | 48003.778  | 32678.343   | 34952.204   | 37301.8995 | 39651.595  | 51542.02   | 38812.35   | 45177.185   |
| 68 | 3-Buten-1-ol, 3-methyl-                                    | 340734.491 | 374088.283  | 359654.158  | nd          | nd         | nd          | 87758.462   | 102272.743 | 103093.151 | 321250.656 | 330311.975 | 293960.722  |
| 69 | Thiazole, 5-ethyl-2-methyl-                                | 46167.993  | 51839.614   | 49003.8035  | nd          | nd         | nd          | nd          | nd         | nd         | 13288.2    | 17782.8905 | 15535.54525 |
| 70 | 1-Pentanol                                                 | 4371213.11 | 4053713.72  | 3736214.33  | 3397906.85  | 3338569.75 | 3329499.95  | 2991931.96  | 2856785.91 | 2957416.73 | 2470562.35 | 2237214.07 | 2583767.59  |
| 71 | 3-Hexenoic acid, methyl ester                              | 245674.945 | 210072.773  | 206769.652  | nd          | nd         | nd          | 78006.164   | 66917.463  | 59743.139  | 276960.228 | 272151.396 | 264300.558  |
| 72 | Glutaric acid, monoamide, N-(4-methylbenzyl)-, decyl ester | 40195.844  | 39298.02    | 39746.932   | 14594.749   | 12743.275  | 16992.009   | 14184.797   | 12399.638  | 13292.2175 | 20636.35   | 20700.085  | 20533.367   |
| 73 | 1,4-Cyclohexadiene-1-methanol, 4-(1-methylethyl)-          | 257717.45  | 297865.171  | 277791.3105 | 182793.917  | 170758.557 | 163875.055  | 203075.85   | 168323.146 | 169178.377 | 157698.267 | 164892.688 | 161295.4775 |
| 74 | Ylangenol                                                  | 31217.774  | 36386.632   | 33802.203   | 25444.062   | 21456.882  | 23710.528   | 29312.939   | 25168.742  | 22797.884  | 25120.434  | 22845.941  | 29861.707   |
| 75 | Acetic acid, phenylmethyl ester                            | 581287.263 | 693360.431  | 637323.847  | 367678.676  | 367026.785 | 301388.617  | 423088.242  | 394437.846 | 410480.174 | 546449.038 | 536555.502 | 541502.27   |
| 76 | Cedrol                                                     | 451351.428 | 383805.0675 | 316258.707  | 295562.6415 | 308075.941 | 283049.342  | 318786.0335 | 315727.818 | 321844.249 | 405885.647 | 262854.683 | 334370.165  |
| 77 | 6-Methyl-6-(5-methylfuran-2-yl)heptan-2-one                | 4670926.06 | 5250547.09  | 4960736.575 | 2911609.77  | 3168739.7  | 2883801.13  | 3593019.16  | 3021472.37 | 3131576.11 | 2668742.67 | 2561476.23 | 2615109.45  |
| 78 | 9,19-Cyclolanostan-24-one, 3-acetoxy-25-methoxy-           | 13433.321  | 11737.901   | 12585.611   | nd          | nd         | nd          | 5983.029    | 6269.5     | 5696.558   | 6563.357   | 8599.2235  | 7581.29025  |
| 79 | 2-(1,1-Dimethylethyl)-6-(1-methylethyl)phenol              | 24337.784  | 24338.166   | 24338.548   | 21471.5465  | 21950      | 20993.093   | 25104.116   | 23548.622  | 21096.218  | 18604.518  | 21096.205  | 19850.3615  |
| 80 | Cyclohexanone, 2,2,6-trimethyl-                            | 2685656.68 | 3091665.19  | 2428312.84  | 1665032.81  | 1888916.01 | 2212684.14  | 2166420.17  | 2346934.88 | 2215200.05 | 2297199.25 | 2091262.95 | 1983471     |
| 81 | Dimethyl phthalate                                         | 469298.577 | 487759.558  | 478529.0675 | 280909.872  | 317167.232 | 244652.512  | 286736.08   | 266394.879 | 307077.281 | 235871.331 | 256831.778 | 246351.5545 |
| 82 | Pyrazine, 2,6-dimethyl-                                    | 179941.354 | 197972.564  | 191127.758  | 174925.098  | 224878.145 | 199901.6215 | 1474308.59  | 1383358.12 | 1663904.52 | 631569.802 | 629907.717 | 763751.489  |
| 83 | p-Nitrophenyl hexanoate                                    | 2412625.96 | 2260029.195 | 2107432.43  | 1921905.94  | 2325464.03 | 1825604.61  | 1588463.8   | 1633717.04 | 1951491.6  | 1697275.21 | 1607017.39 | 2017341.79  |
| 84 | 2-Penten-1-ol, (Z)-                                        | 39747358.7 | 37306296.4  | 39953931    | 13923868.3  | 14364905.5 | 13859087.9  | 13064974    | 12816324.7 | 12800893.5 | 38427571.4 | 38020170.8 | 36250429.9  |
| 85 | 2-Heptanol                                                 | 118340.203 | 125991.068  | 113749.461  | 42393.333   | 36378      | 44370.035   | 32963.77    | 34925.339  | 33708.072  | 103643.182 | 101782.487 | 92812.513   |
| 86 | 4,4-Dimethyl-cyclohex-2-en-1-ol                            | 47078.54   | 42975.2145  | 38871.889   | nd          | nd         | nd          | nd          | nd         | nd         | 95009.46   | 90131.917  | 99975.455   |

|     |                                           |            |             |             |             |            |             |             |            |             |            |             |             |
|-----|-------------------------------------------|------------|-------------|-------------|-------------|------------|-------------|-------------|------------|-------------|------------|-------------|-------------|
| 87  | Oxalic acid, cyclohexyl dodecyl ester     | 71429.147  | 60831.797   | 50234.447   | 60331.23    | 81261.059  | 58624.303   | 86286.184   | 84187.604  | 95794.149   | 85279.269  | 119282.5565 | 102280.9128 |
| 88  | 2-Hexen-1-ol, acetate, (Z)-               | 100169.123 | 99684.584   | 99200.045   | nd          | nd         | nd          | nd          | nd         | nd          | 85429.754  | 74351.5     | 96508.008   |
| 89  | 1,7-Octadiene-3,6-diol, 2,6-dimethyl-     | 514299.404 | 605389.931  | 559844.6675 | 235862.748  | 273960.877 | 254911.8125 | 331747.43   | 403345.381 | 367546.4055 | 599113.413 | 508604.564  | 553858.9885 |
| 90  | 1-Tetradecene                             | 120081.98  | 114077.31   | 117079.645  | 34988.914   | 40640.586  | 44021.848   | 57165.4705  | 63841.685  | 50489.256   | 63094.543  | 40444.554   | 51769.5485  |
| 91  | Propanoic acid, 2-methyl-, hexyl ester    | 132445.681 | 125882.934  | 119320.187  | 49230.689   | 65368.537  | 57299.613   | 50029.985   | 52501.888  | 54973.791   | 77963.113  | 98710.355   | 119457.59   |
| 92  | 5-Heptenal, 2,6-dimethyl-                 | 825744.214 | 787282.8585 | 748821.503  | 604996.937  | 712679.095 | 604038.52   | 483356.589  | 514544.644 | 549554.827  | 415758.576 | 411344.074  | 546277.296  |
| 93  | Cyclopentanone, 2,4,4-trimethyl-          | 85058.734  | 95754.23    | 80996.703   | 61879.131   | 75545.996  | 68712.5635  | 43235.678   | 49496.895  | 44851.539   | 38409.173  | 32964.124   | 35686.6485  |
| 94  | (+)-Borneol                               | 249320.341 | 229692.774  | 255937.258  | 94269.625   | 117132.143 | 98583.881   | 99890.476   | 111738.24  | 105379.489  | 186351.519 | 186092.709  | 188284.926  |
| 95  | 2-Methyl-2,5-divinyltetrahydrofuran       | 111729.557 | 111756.665  | 111702.449  | 79565.308   | 98424.79   | 78125.785   | nd          | nd         | nd          | nd         | nd          | nd          |
| 96  | 1-Hexanol                                 | 27289582.8 | 25543907.3  | 27075422.1  | 10218110    | 10612542.5 | 10930397.1  | 8558527.7   | 8724592.13 | 8696225.75  | 22570134.4 | 22151467.3  | 20111300    |
| 97  | 1H-Inden-1-one, octahydro-7a-hydroxy-     | 272981.545 | 228943.4525 | 250962.4988 | 174645.326  | 170466.654 | 172584.63   | 285125.233  | 253202.939 | 246528.373  | 201625.186 | 171370.638  | 186497.912  |
| 98  | 3-Nonanol                                 | 129486.601 | 125390.273  | 114437.298  | nd          | nd         | nd          | 26907.086   | 24365.05   | 25636.068   | 49631.947  | 61234.865   | 55433.406   |
| 99  | 6-Methylhept-4-en-1-yl 2-methylbutanoate  | 198399.695 | 175655.3515 | 152911.008  | 222831.8295 | 219816.271 | 225847.388  | 210106.041  | 264612.266 | 226026.325  | 223205.819 | 171272.529  | 197239.174  |
| 100 | 4-Pyridinamine, N,N-dimethyl-             | 179482.228 | 168623.414  | 140249.705  | 68564.305   | 85040.273  | 66751.166   | 647214.466  | 582405.629 | 697459.782  | 644108.976 | 665441.487  | 822714.221  |
| 101 | 3-Hexen-1-ol, (E)-                        | 68912378.9 | 64793124.7  | 69242813.9  | 25595679.6  | 28272581.7 | 27747744.1  | 24915076.1  | 25384907.7 | 25233648.2  | 60359725.7 | 60182352    | 56851350.9  |
| 102 | Tetrahydrofuran, 2-isobutenyl-4-vinyl-    | 258168.911 | 299989.295  | 303766.927  | 259860.765  | 296912.771 | 222808.759  | 228049.7115 | 220939.643 | 235159.78   | 185527.041 | 146636.574  | 166081.8075 |
| 103 | Benzeneethanol, 2-hydroxy-                | 68755.471  | 88281.752   | 78518.6115  | 65589.334   | 45420.064  | 52280.267   | 63359.128   | 53296.499  | 60870.991   | 38043.122  | 44701.019   | 41372.0705  |
| 104 | Hexanoic acid, hexyl ester                | 146411.843 | 140135.057  | 132967.233  | 94751.7945  | 112460.196 | 77043.393   | 92250.642   | 100836.85  | 109423.058  | 95850.306  | 113760.135  | 104805.2205 |
| 105 | 2-Propenal, 2-methyl-3-phenyl-            | 26298.726  | 33138.188   | 29718.457   | nd          | nd         | nd          | nd          | nd         | nd          | nd         | nd          | nd          |
| 106 | 2-Hexen-1-ol, (E)-                        | 72770244.2 | 68460373.8  | 71090182.8  | 25846023.4  | 28201937.2 | 27845131.7  | 22259287.7  | 22666700.7 | 22381984.2  | 62468298.8 | 61990588    | 58820581.3  |
| 107 | 5-Ethylcyclopent-1-enecarboxaldehyde      | 266664.469 | 299227.819  | 240263.922  | 230031.027  | 256704.764 | 260785.931  | 211413.113  | 199121.3   | 203257.309  | 267520.744 | 256968.67   | 268434.993  |
| 108 | 2-Cyclopenten-1-one, 2,3,4,5-tetramethyl- | 90522.982  | 84108.8835  | 77694.785   | 61104.205   | 65808.857  | 55751.705   | 71108.479   | 72205.905  | 70011.053   | 58427.969  | 48034.79    | 53231.3795  |
| 109 | 2-Hexen-1-ol, (Z)-                        | 1102787.13 | 1028578.28  | 1086968.25  | 341901.352  | 394871.807 | 391639.975  | 320642.198  | 323552.129 | 324727.04   | 902373.057 | 887538.584  | 840488.765  |
| 110 | Fumaric acid, heptyl myrtenyl ester       | 12652.504  | 17036       | 14844.252   | nd          | nd         | nd          | nd          | nd         | nd          | nd         | nd          | nd          |

|     |                                                                     |             |             |             |            |            |            |            |            |             |            |            |             |
|-----|---------------------------------------------------------------------|-------------|-------------|-------------|------------|------------|------------|------------|------------|-------------|------------|------------|-------------|
| 111 | Decanal                                                             | 252223.3403 | 300023.6295 | 276123.4849 | nd         | nd         | nd         | nd         | nd         | nd          | nd         | nd         | nd          |
| 112 | 3-Hexanol, 2-methyl-                                                | 142839.549  | 139205.237  | 135634.25   | 145261.394 | 159324.406 | 135449.912 | 185389.632 | 188051.545 | 189766.798  | 123953.565 | 126120.18  | 120952.878  |
| 113 | Methional                                                           | 510518.255  | 485247.124  | 509878.987  | 438822.581 | 485370.711 | 416152.085 | 434221.433 | 405866.383 | 444255.531  | 441444.409 | 456318.813 | 477650.751  |
| 114 | Eicosyl heptyl ether                                                | 24438.069   | 19799.468   | 22118.7685  | nd         | nd         | nd         | 8596.3025  | 10161.749  | 7030.856    | nd         | nd         | nd          |
| 115 | 1-Octen-3-ol                                                        | 13709588.9  | 14222229.6  | 13965909.25 | 6478635.03 | 8564678.87 | 7548297.8  | 8354490.4  | 8419380.16 | 8458318.43  | 9744278.85 | 8154127.61 | 8949203.23  |
| 116 | Furfural                                                            | 4787471.86  | 4896533.9   | 4391231.33  | 2706219.78 | 3130895.1  | 2460702.61 | 5091256.38 | 4931300.45 | 5406548.96  | 15367825.5 | 16424308.6 | 18758600.5  |
| 117 | 2-Octanone                                                          | 9236822.58  | 8519428.45  | 9954216.71  | 17196673.4 | 13186997.7 | 19244473.9 | 16147302.8 | 17951373.5 | 15600421.1  | 18112254   | 14996314.7 | 16554284.35 |
| 118 | 3-Methyl-hexahydrophthalide                                         | 2889188.54  | 2567335.795 | 2245483.05  | 828208.228 | 957228.87  | 1067368.59 | 1026842.21 | 1015349.43 | 957338.187  | 1596035.67 | 1447838.58 | 1521937.125 |
| 119 | (R,S)-5-Ethyl-6-methyl-3E-hepten-2-one                              | 432529.646  | 445294.446  | 438912.046  | 218852.158 | 221644.886 | 251824.539 | 243548.983 | 212640.192 | 228094.5875 | 256990.567 | 249500.955 | 253245.761  |
| 120 | 6-Hepten-1-ol, 2-methyl-                                            | 1940239.23  | 1928618.69  | 1732380.09  | 570036.983 | 633691.558 | 650096.649 | 550526.419 | 516750.07  | 516227.662  | 1415336.82 | 1379370.01 | 1402881.5   |
| 121 | 2H-Pyran, 3,6-dihydro-4-methyl-2-(2-methyl-1-propenyl)-             | 49722.869   | 46241.243   | 42759.617   | nd         | nd         | nd         | 39344.052  | 39937.526  | 40531       | 33835.359  | 28312.989  | 31074.174   |
| 122 | 1H-Pyrrole, 1-ethyl-                                                | 269700.298  | 183692.158  | 226696.228  | 138222.661 | 145318.141 | 124770.75  | 302017.852 | 243337.452 | 256041.243  | 605918.695 | 599738.703 | 603733.549  |
| 123 | p-Mentha-1(7),8(10)-dien-9-ol                                       | 326805.01   | 386426.493  | 356615.7515 | 203781.528 | 191310.057 | 197925.943 | 190121.845 | 175234.454 | 175726.844  | 216986.596 | 212305.617 | 265494.368  |
| 124 | Ethyl 2-(5-methyl-5-vinyltetrahydrofuran-2-yl)propan-2-yl carbonate | 96754323.4  | 93626074.5  | 92711336.7  | 50864707.9 | 57492585.2 | 52092255.8 | 50509823.7 | 49966569   | 50809918    | 76425112.3 | 77496848.7 | 79824528.3  |
| 125 | 2-Butenal, 2-ethyl-                                                 | 697062.696  | 1021876.95  | 859469.823  | 239215.895 | 298029.374 | 317070.689 | 657010.458 | 542356.514 | 534788.817  | 2638758.36 | 2433405.94 | 2619938.77  |
| 126 | 1,6,10-Dodecatrien-3-ol, 3,7,11-trimethyl-, (E)-                    | 946525.576  | 845614.058  | 744702.54   | 588748.147 | 597310.176 | 577763.488 | 548478.677 | 541436.5   | 555520.854  | 436491.823 | 441470.709 | 438981.266  |
| 127 | Octanal                                                             | 1325856.52  | 1117241.612 | 908626.704  | 501007.208 | 651735.939 | 659284.091 | 765599.525 | 662350.787 | 689604.233  | 702432.386 | 674610.956 | 688521.671  |
| 128 | 4-Heptenal, (Z)-                                                    | 318146.587  | 268300.468  | 218454.349  | 163438.717 | 168207.412 | 159286.087 | 205512.591 | 167936.27  | 163141.684  | 201767.723 | 182006.756 | 172003.313  |
| 129 | Benzaldehyde, 2,5-dimethyl-                                         | 667809.329  | 646019.226  | 624229.123  | 482167.682 | 540851.278 | 556328.892 | 746342.803 | 761371.497 | 721514.297  | 828002.628 | 812292.938 | 970896.181  |
| 130 | 2-Furanecarboxylic acid, 3,5-dimethylcyclohexyl ester               | 742989.89   | 823592.975  | 625103.077  | 466985.793 | 535783.187 | 455667.324 | 918687.504 | 892083.392 | 985888.937  | 1371425.4  | 1453510.55 | 1609538.81  |
| 131 | 1H-Pyrrole-2-carboxaldehyde                                         | 340224.682  | 318217.4705 | 296210.259  | 157400.543 | 149218.883 | 122021.547 | 423813.915 | 371915.163 | 414019.92   | 1385955.45 | 1477415.57 | 1431685.51  |

|     |                                                                    |            |             |             |             |            |             |             |            |            |            |            |             |
|-----|--------------------------------------------------------------------|------------|-------------|-------------|-------------|------------|-------------|-------------|------------|------------|------------|------------|-------------|
| 132 | 3-Cyclopentylpropionic acid, 1-(cyclopentyl)ethyl ester            | 106688.019 | 101998.3    | 98984.597   | 94580.005   | 93246.399  | 92614.607   | 111268.483  | 114059.59  | 117674.809 | 125649.54  | 138332.34  | 131175.803  |
| 133 | 3-Ethyl-4-methylpentan-1-ol                                        | 165144.886 | 185023.594  | 175084.24   | 74388.652   | 97109.744  | 97725.276   | 88219.759   | 79713.644  | 88103.351  | 130620.908 | 106715.045 | 120318.82   |
| 134 | Benzaldehyde                                                       | 72968940.3 | 74068442.4  | 61982295.9  | 42577355.3  | 49529377.1 | 41276321.7  | 44350600.9  | 41839718   | 45087723   | 51933440.1 | 52774537.6 | 64487905.6  |
| 135 | Benzoic acid, 2-formyl-4,6-dimethoxy-, 8,8-dimethoxyoct-2-yl ester | 1185458.9  | 966591.126  | 1045365.07  | 1078662.99  | 1044780.78 | 1140405.96  | 1048919.2   | 1052063.76 | 922926.476 | 902813.646 | 818237.476 | 860525.561  |
| 136 | 3,5-Octadien-2-one, (E,E)-                                         | 3172092.38 | 3437512.27  | 2568273.92  | 1572548.62  | 1900907.39 | 1768131.48  | 1638892.53  | 1580315.5  | 1614091.49 | 2116889.55 | 2060299.65 | 2417674.76  |
| 137 | 5-Hexenal, 4-methylene-                                            | 186393.825 | 210543.852  | 177165.094  | 86059.855   | 96420.205  | 86415.446   | 84943.059   | 76962.306  | 90644.866  | 137838.522 | 139959.025 | 181832.425  |
| 138 | 2-Pentene-1,4-dione, 1-(1,2,2-trimethylcyclopentyl)                | 651976.759 | 730459.908  | 569080.9    | 386395.853  | 495164.677 | 459077.856  | 495422.737  | 474688.673 | 474709.442 | 465162.994 | 436389.495 | 532383.83   |
| 139 | 2-Dodecenal                                                        | 499882.698 | 450611.425  | 401340.152  | 266401.736  | 346389.964 | 298925.393  | 348829.6    | 329812.603 | 303859.094 | 308721.779 | 294059.254 | 301390.5165 |
| 140 | cis-Muurola-4(15),5-diene                                          | 402273.677 | 412194.502  | 422115.327  | nd          | nd         | nd          | 389736.602  | 358760.413 | 317153.715 | 261197.388 | 212217.527 | 236707.4575 |
| 141 | Octadecanoic acid, ethenyl ester                                   | 354094.735 | 282456.439  | 303758.344  | 338788.633  | 318658.03  | 331892.324  | 320232.074  | 275570.484 | 293778.928 | 261275.534 | 251480.951 | 252577.755  |
| 142 | Linalool                                                           | 104796021  | 114343387   | 89670706.9  | 44111638.4  | 50332067.3 | 55110911    | 51527312.5  | 46767825.7 | 45957367   | 73323868   | 71412917.1 | 78894298.3  |
| 143 | Orcinol                                                            | 857497.036 | 980570.606  | 729660.011  | 628696.633  | 690719.876 | 631517.822  | 839876.414  | 772587.152 | 819136.792 | 557391.395 | 542761.956 | 614133.026  |
| 144 | 2-Cyclohexen-1-ol, 2,4,4-trimethyl-                                | 91628.182  | 98380.842   | 86034.75    | 74087.462   | 86210.421  | 83758.662   | 93118.415   | 88821.593  | 88770.916  | 87876.613  | 82252.73   | 81072.339   |
| 145 | (+)-2-Bornanone                                                    | 319708.711 | 296126.9265 | 272545.142  | 364497.33   | 321989.499 | 279481.668  | 238055.4105 | 215360.392 | 260750.429 | 269318.237 | 259304.358 | 264311.2975 |
| 146 | Ethanone, 1-(2-methyl-1-cyclopenten-1-yl)-                         | 477562.822 | 507234.746  | 432671.318  | 301314.519  | 329273.406 | 263696.31   | 621192.605  | 615034.966 | 672680.827 | 1548524.72 | 1731979.06 | 2015901.2   |
| 147 | 2,6-Octadiene-1,8-diol, 2,6-dimethyl-                              | 111673.683 | 115019.393  | 115603.078  | 116528.027  | 145418.7   | 130973.3635 | 107375.816  | 131012.144 | 154648.472 | 270816.217 | 236015.599 | 218604.923  |
| 148 | 2-Heptenal, (Z)-                                                   | 4091135.52 | 3764139.825 | 3437144.13  | 3462737.07  | 5047120.25 | 4467602.14  | 5696489.115 | 5706428.98 | 5686549.25 | 6855891.29 | 5558659.55 | 6207275.42  |
| 149 | 1-Cyclohexene-1-carboxaldehyde, 2,6,6-trimethyl-                   | 4395318.98 | 5023391.51  | 4709355.245 | 2155333.45  | 2898226.2  | 2711609.28  | 2886717     | 2742923.63 | 2791000.47 | 2496927.37 | 2308260.03 | 3138492.5   |
| 150 | 1H-Pyrrole-2,5-dione, 1-ethyl-                                     | 148856.754 | 138628.1305 | 128399.507  | 227993.2305 | 239640.252 | 216346.209  | 233122.83   | 245552.948 | 250819.32  | 372630.021 | 414382.454 | 393506.2375 |
| 151 | 2,6-Nonadienal, (E,Z)-                                             | 723870.117 | 633536.15   | 543202.183  | 328576.375  | 391984.628 | 356780.549  | 439612.408  | 373434.952 | 384513.982 | 397498.229 | 411666.468 | 404582.3485 |
| 152 | Lilac aldehyde D                                                   | 54942.74   | 57210.005   | 49836.403   | nd          | nd         | nd          | 31142.125   | 31331.787  | 31521.449  | nd         | nd         | nd          |

|     |                                                                                      |             |             |             |            |             |            |            |            |            |            |            |             |
|-----|--------------------------------------------------------------------------------------|-------------|-------------|-------------|------------|-------------|------------|------------|------------|------------|------------|------------|-------------|
| 153 | 2-(3-methyl-2-cyclopenten-1-yl)-2-methylpropionaldehyde                              | nd          | nd          | nd          | nd         | nd          | nd         | 58164.145  | 63294.383  | 61914.86   | 93570.904  | 87456.002  | 90513.453   |
| 154 | Cyclopropanecarboxylic acid, 2-methyl-, 2,6-di- <i>t</i> -butyl-4-methylphenyl ester | 928236.758  | 857183.37   | 696775.811  | 384410.641 | 369027.02   | 328578.14  | 314066.496 | 341413.056 | 310446.301 | 394316.287 | 405896.495 | 430612.623  |
| 155 | 2-Octenal, (E)-                                                                      | 205346.0555 | 226033.126  | 184658.985  | nd         | nd          | nd         | nd         | nd         | nd         | nd         | nd         | nd          |
| 156 | 3-Buten-2-one, 4-(2-hydroxy-2,6,6-trimethylcyclohexyl)-                              | 170836.248  | 176475.378  | 173655.813  | 74019.9995 | 72626.605   | 75413.394  | 74221.439  | 60178.105  | 67199.772  | nd         | nd         | nd          |
| 157 | 2,6-Dimethyl-2-trans-6-octadiene                                                     | 1331272.07  | 1185384.355 | 1039496.64  | 926524.495 | 1137196.513 | 1347868.53 | 1728715.99 | 1718428.83 | 1740105.87 | 1838315    | 1373213.85 | 1605764.425 |
| 158 | Acetylacetone                                                                        | 25360.685   | 34175.326   | 29768.0055  | 17611.121  | 12141.304   | 14876.2125 | 22604.497  | 19250.886  | 15897.275  | nd         | nd         | nd          |
| 159 | Ethanone, 1-(1,4-dimethyl-3-cyclohexen-1-yl)-                                        | 200971.414  | 189869.246  | 168853.047  | 105180.718 | 140844.586  | 118373.86  | 129405.905 | 105359.35  | 106688.196 | 81933.958  | 82687.919  | 82310.9385  |
| 160 | 1H-Pyrrole-2-carboxaldehyde, 1-ethyl-                                                | 3841440.35  | 4131340.44  | 3529791.36  | 1492123.11 | 1677880.59  | 1419825.38 | 5261004.47 | 5140371.32 | 5473944.81 | 14881478.3 | 15834944.9 | 17146703.5  |
| 161 | 1H-Cycloprop[e]azulene, decahydro-1,1,7-trimethyl-4-methylene-                       | 38209.641   | 39190.647   | 40171.653   | 42089.189  | 38626.139   | 37825.897  | 50857.63   | 46887.102  | 48726.021  | 37450.223  | 36707.274  | 37078.7485  |
| 162 | 1,5,7-Octatrien-3-ol, 3,7-dimethyl-                                                  | 15469026    | 17046683.8  | 13035122.1  | 9287429.52 | 10421148.4  | 8841426.8  | 12771131.4 | 11421462.1 | 11786228.2 | 19443832.4 | 19458102.2 | 22747456.6  |
| 163 | Acetaldehyde                                                                         | 767982.071  | 687644.653  | 740322.187  | 451065.66  | 641056.433  | 621829.041 | 676223.707 | 665355.214 | 625049.899 | 680700.094 | 768604.849 | 738797.073  |
| 164 | Fumaric acid, cyclohex-3-enylmethyl isohexyl ester                                   | 77795.912   | 88061.399   | 65264.895   | 32318.957  | 32958.798   | 34977.562  | 35025.328  | 35445.7855 | 35866.243  | 65078.803  | 66728.24   | 74165.666   |
| 165 | Resorcinol                                                                           | 197078.792  | 136621.263  | 166850.0275 | 88672.638  | 85000.512   | 81880.826  | 64558.688  | 67325.153  | 61792.223  | 57817.407  | 59444.379  | 60308.773   |
| 166 | 2,4-Heptadienal, (E,E)-                                                              | 17374740.3  | 15395784.6  | 16385262.45 | 7239981.63 | 7998147.57  | 6970010.75 | 6676182.38 | 6233916.11 | 6433949.59 | 8543350.65 | 8477345.13 | 10586204.3  |
| 167 | Ethanol, 2-(2-ethoxyethoxy)-                                                         | 161314.195  | 166587.596  | 163950.8955 | 128392.423 | 118699.454  | 98729      | 121583.236 | 113360.714 | 94589.127  | 118824.024 | 109213.852 | 114018.938  |
| 168 | Bicyclo[4.4.0]dec-1-ene, 2-isopropyl-5-methyl-9-methylene-                           | 288646.488  | 254339.9795 | 220033.471  | 197726.419 | 171937.347  | 172695.891 | 175400.868 | 155045.516 | 145879.743 | 141979.012 | 131473.632 | 136726.322  |
| 169 | Isobutyl laurate                                                                     | 22760.408   | 26287.392   | 20167.159   | 18321.773  | 15053.482   | 12751.303  | nd         | nd         | nd         | 13260.97   | 15807.1965 | 18353.423   |
| 170 | Benzenamine, 4-methoxy-2-methyl-                                                     | 145520.652  | 156523.938  | 126989.377  | nd         | nd          | nd         | 257621.603 | 237493.594 | 257273.225 | 362391.622 | 356450.857 | 455562.889  |



|     |                                              |            |             |             |            |             |             |            |            |            |            |            |             |
|-----|----------------------------------------------|------------|-------------|-------------|------------|-------------|-------------|------------|------------|------------|------------|------------|-------------|
|     | 2,6-Dimethyl-8-(tetrahydropyran-2-yl         | nd         | nd          | nd          | nd         | nd          | nd          | 33679.137  | 31302.9755 | 28926.814  | 31677.906  | 26827.224  | 29252.565   |
| 171 | oxy)-octa-2,6-dien-1-ol                      |            |             |             |            |             |             |            |            |            |            |            |             |
|     | 1,3-Cyclohexadiene-1-carboxaldehyde,         | 499430.676 | 441615.9265 | 383801.177  | 277883.353 | 329312.443  | 341614.533  | 508397.853 | 491192.438 | 473219.816 | 570445.862 | 545733.58  | 671161.111  |
| 172 | 2,6,6-trimethyl-                             |            |             |             |            |             |             |            |            |            |            |            |             |
| 173 | Furan, 3-methyl-                             | 242993.86  | 265528.322  | 202172.85   | 140428.235 | 187596.022  | 200802.145  | 210276.476 | 203103.323 | 184423.771 | 219210.992 | 160451.096 | 181579.33   |
| 174 | 2-(Prop-2-enoyloxy)tridecane                 | 118265.596 | 148001.724  | 142898.518  | 75895.649  | 65166.012   | 62427.136   | 90832.251  | 74144.249  | 76370.295  | 86783.244  | 81676.739  | 103166.188  |
| 175 | Pentanoic acid, 2-methyl-, anhydride         | 538162.888 | 610961.613  | 574562.2505 | 250012.001 | 292177.1395 | 334342.278  | 298772.774 | 282690.967 | 225140.663 | 383348.55  | 377287.161 | 380317.8555 |
| 176 | Hexanoic acid, 3-hexenyl ester, (Z)-         | 4269210.69 | 3871814.24  | 3474417.79  | 1922491.53 | 2015310.82  | 1931769.72  | 2452096.4  | 2124157.64 | 2064012.15 | 2268227.88 | 1980352.84 | 2124290.36  |
|     | Ethanone, 2-(3-nitro-[1,2,4]triazol-1-yl)-1- | 96896.896  | 89719.8805  | 82542.865   | 58145.272  | 71377.487   | 64761.3795  | nd         | nd         | nd         | 84046.816  | 85256.505  | 96896.034   |
| 177 | thiophen-2-yl-                               |            |             |             |            |             |             |            |            |            |            |            |             |
| 178 | 3-Hexenal                                    | 932150.893 | 948186.412  | 916115.374  | 447399.993 | 418354.412  | 426932.402  | 453195.01  | 444834.36  | 461555.66  | 600571.516 | 593585.13  | 646805.328  |
| 179 | Hydratropic acid, butyl ester                | 90416.23   | 79631.915   | 68847.6     | 92676.367  | 96867.69    | 88485.044   | 62192.349  | 57930.915  | 66453.783  | 69122.866  | 70595.848  | 69859.357   |
| 180 | 1-Nonanol                                    | 1310414.15 | 1627757.72  | 1469085.935 | 576402.902 | 619308.073  | 645965.415  | 732245.572 | 628944.547 | 630510.682 | 738769.038 | 681565.562 | 710167.3    |
| 181 | 1-Octanol                                    | 2384936.5  | 2025038.765 | 2204987.633 | 1333620.86 | 1541695.7   | 1487506.5   | 1614643.8  | 1431524.19 | 1469538.45 | 1558929.2  | 1415187.4  | 2027409.22  |
| 182 | trans-2-Hexenyl isovalerate                  | 1082697.66 | 931405.9965 | 780114.333  | 277611.248 | 360315.519  | 398066.796  | 520250.315 | 501261.664 | 448122.984 | 471254.917 | 394423.963 | 432839.44   |
| 183 | Hexanoic acid, 2-hexenyl ester, (E)-         | 1786240.55 | 1613443.495 | 1440646.44  | 847624.724 | 900325.672  | 844521.507  | 1109539.44 | 963578.73  | 938832.486 | 1014490.13 | 869164.75  | 941827.44   |
| 184 | Butanoic acid, 3-methyl-                     | 3804649.07 | 3756772.24  | 3659718.68  | 2782697.47 | 2623983.955 | 2465270.44  | 2804336.75 | 2633876.73 | 2851063.48 | 2477254.03 | 2559428.13 | 2991073.14  |
| 185 | 2,6-Octadienal, 3,7-dimethyl-, (Z)-          | 1323780    | 1196245.625 | 1068711.25  | 663524.442 | 661370.998  | 654714.808  | 685478.382 | 576822.307 | 600937.048 | 761550.388 | 749150.854 | 755350.621  |
| 186 | Formic acid, phenylmethyl ester              | 195946.9   | 251466.451  | 196208.313  | 165755.645 | 142724.802  | 133180.961  | 166410.596 | 151468.572 | 162634.432 | 224771.333 | 225159.6   | 301455.573  |
|     | Bicyclo[3.1.1]hept-2-en-6-one, 2,7,7-        | 55171.519  | 52811.017   | 50450.515   | 36302.194  | 34020.044   | 34221.302   | 40929.584  | 38204.3615 | 35479.139  | 29489.143  | 40695.377  | 35092.26    |
| 187 | trimethyl-                                   |            |             |             |            |             |             |            |            |            |            |            |             |
| 188 | 3-Thiophenecarboxaldehyde                    | 146565.118 | 158439.618  | 126531.598  | 84767.506  | 100064.931  | 86481.522   | 144317.008 | 137570.914 | 140362.4   | 160390.271 | 175930.202 | 201950.659  |
| 189 | 2-Octen-4-one, 2-methoxy-                    | 150135.077 | 214789.268  | 182462.1725 | nd         | nd          | nd          | nd         | nd         | nd         | nd         | nd         | nd          |
| 190 | Carotol                                      | 463455.791 | 416411.7355 | 369367.68   | 395112.003 | 392083.19   | 393597.5965 | 347705.99  | 281427.332 | 316574.526 | 346964.447 | 297034.829 | 321999.638  |
|     | 2-(1-Pyrrolidinyl)ethyl 4-                   | 478100.604 | 565443.588  | 521772.096  | nd         | nd          | nd          | nd         | nd         | nd         | nd         | nd         | nd          |
| 191 | propoxysalicylate                            |            |             |             |            |             |             |            |            |            |            |            |             |

|     |                                                                     |            |             |             |             |            |            |            |            |            |             |            |             |
|-----|---------------------------------------------------------------------|------------|-------------|-------------|-------------|------------|------------|------------|------------|------------|-------------|------------|-------------|
| 192 | 2(3H)-Furanone, 5-ethyldihydro-                                     | 2852863.32 | 3011681.34  | 2499051.16  | 1913452.07  | 2169518.76 | 1771627.43 | 1921218.52 | 1829156.27 | 1920392.96 | 2153361.39  | 2212576.06 | 2562976.13  |
| 193 | trans-Geranic acid methyl ester                                     | 425303.446 | 378292.608  | 331281.77   | 155551.166  | 178377.164 | 193785.67  | 231215.117 | 213398.367 | 201796.117 | 224891.61   | 208902.456 | 216897.033  |
| 194 | 1-Methylverbenol                                                    | 464569.121 | 488622.169  | 403350.201  | 233660.152  | 269858.828 | 250903.898 | 251500.977 | 223339.288 | 226886.376 | 302015.134  | 313093.943 | 331230.285  |
| 195 | 7-Octen-2-ol, 2-methyl-6-methylene-                                 | 85370.362  | 79374.1205  | 73377.879   | 79080.729   | 64234.888  | 63326.983  | 65450.571  | 51923.033  | 58686.802  | 70895.039   | 71801.788  | 71348.4135  |
| 196 | 2-Methyl-7-oxabicyclo[2.2.1]heptane                                 | 750378.856 | 524932.473  | 637655.6645 | 335030.9    | 375469.573 | 375941.939 | 578993.771 | 535570.412 | 557118.292 | 563558.973  | 433815.418 | 498687.1955 |
| 197 | 2-Hexene, 3,5,5-trimethyl-                                          | 3863365.87 | 3285196.015 | 2707026.16  | 2087703.62  | 2801133.65 | 2395400.77 | 2842363.15 | 2909211.89 | 2951157.21 | 3251294.47  | 2642345.1  | 2946819.785 |
| 198 | (+)-epi-Bicyclosquiphellandrene                                     | 649575.227 | 592816.48   | 536057.733  | 486402.18   | 409345.108 | 364749.191 | 307226.794 | 316290.003 | 297458.876 | 247545.54   | 268499.89  | 311614.999  |
| 199 | 2,4,8-Trimethyl-1,2,3,4-tetrahydroquinoline                         | 116701.339 | 109464.385  | 113082.862  | 75151.171   | 57726.204  | 54453.602  | 44592.8405 | 48626.284  | 40559.397  | 41202.961   | 43127.6945 | 45052.428   |
|     | 2-Cyclohexene-1-methanol, 2,6,6-trimethyl-                          | 320958.588 | 321291.17   | 282374.224  | 208149.044  | 241528.957 | 185401.815 | 187568.952 | 196012.948 | 196766.779 | 192995.26   | 217390.105 | 279381.87   |
| 200 | Hexanoic acid, methyl ester                                         | 965098.544 | 839636.711  | 758507.787  | 235108.2745 | 209705.316 | 260511.233 | 339643.931 | 371479.539 | 307808.323 | 900476.175  | 785554.316 | 771565.224  |
| 202 | 2-Cyclohexen-1-one, 3-methyl-6-(1-methylethyl)-                     | 281965.297 | 265428.4125 | 248891.528  | 681516.604  | 553387.486 | 617452.045 | 434221.089 | 360177.567 | 422783.735 | 941039.265  | 537677.206 | 739358.2355 |
|     | 3,4-Dimethyl-3-pyrrolin-2-one                                       | 4858961.97 | 4353567.525 | 3848173.08  | 7288687.87  | 5127523.72 | 6782497.21 | 6667619.83 | 7915097.88 | 7524804.31 | 9376233.76  | 11050556.7 | 10213395.23 |
| 204 | 2,6-Octadienal, 3,7-dimethyl-, (E)-                                 | 11753260.5 | 10492483.14 | 9231705.78  | 6518501.56  | 6304174.22 | 6160779.4  | 6532461.17 | 5555761.1  | 5673790.06 | 6489035.98  | 6405826.98 | 8629214.13  |
| 205 | Hexanoic acid, ethyl ester                                          | 185231.77  | 163343.366  | 141454.962  | 96934.535   | 124692.83  | 112306.983 | 89073.2065 | 91556.389  | 86590.024  | 82158.957   | 67635.556  | 88986.545   |
| 206 | Phenol, 4-propyl-                                                   | 251675.258 | 309962.504  | 220010.873  | 242382.333  | 221306.703 | 200231.073 | 194736.957 | 194245.576 | 181404.109 | 130049.312  | 152977.123 | 141513.2175 |
| 207 | Fumaric acid, isobutyl undec-2-en-1-yl ester                        | 215125.103 | 225341.162  | 188786.266  | 122103.178  | 146393.973 | 115369.578 | 131371.253 | 127526.528 | 123681.803 | 149145.2595 | 140371.141 | 157919.378  |
|     | 4-Amino-2,3-xilenol                                                 | 94428.442  | 110282.923  | 86348.026   | 31862.328   | 29069.816  | 24960.817  | 158590.389 | 157195.133 | 173817.478 | 380750.511  | 406163.958 | 517147.418  |
| 209 | (E)-4-Oxohex-2-enal                                                 | 3088654.28 | 3363420.84  | 2658164.44  | 2021129.28  | 2307674.99 | 1934208.32 | 2215181.34 | 2068959.18 | 2216764.39 | 1866381.04  | 1885531.71 | 2357022.35  |
| 210 | 2-Undecenal                                                         | 248069.497 | 221918.0285 | 195766.56   | 164521.614  | 178408.882 | 150187.009 | 220227.424 | 203794.974 | 215039.104 | 257952.65   | 217786.648 | 237869.649  |
| 211 | Benzamide, N-[4-[7-(benzoyloxy)-2-oxo-2H-1-benzopyran-3-yl]phenyl]- | 851474.258 | 769581.0045 | 687687.751  | 737908.685  | 617813.225 | 517691.179 | 746114.767 | 598062.86  | 640922.871 | 622236.882  | 629075.37  | 625656.126  |
|     | Benzeneacetaldehyde                                                 | 235274422  | 219115250.5 | 202956079   | 170407231   | 182256235  | 157891694  | 188364350  | 167332494  | 186457692  | 170159856   | 180139525  | 231361694   |

|     |                                          |            |             |             |             |            |            |            |            |            |            |             |             |
|-----|------------------------------------------|------------|-------------|-------------|-------------|------------|------------|------------|------------|------------|------------|-------------|-------------|
| 213 | Senkyunolide H                           | 26334.699  | 26202.895   | 26071.091   | nd          | nd         | nd         | nd         | nd         | nd         | nd         | nd          | nd          |
|     | Cyclopenta[c]pentalen-3(3aH)-one,        | 59670.886  | 63957.514   | 61814.2     | 55379.32    | 47121.209  | 38863.098  | 40117.3275 | 41202.008  | 39032.647  | 41424.08   | 37988.608   | 39706.344   |
| 214 | octahydro-1,2,3a,6-tetramethyl-          |            |             |             |             |            |            |            |            |            |            |             |             |
| 215 | (d-Threo-2,3-diphenyl)-2-butanol         | 948901.516 | 1065732.59  | 845064.385  | 784940.115  | 774733.676 | 635237.926 | 928939.769 | 741404.959 | 710561.511 | 814232.147 | 778594.193  | 1054078.82  |
| 216 | 2-Propylphenol, n-propyl ether           | 110573.051 | 141168.452  | 125870.7515 | 48367.4585  | 45828.022  | 50906.895  | 60957.875  | 53804.563  | 54205.228  | 52016.775  | 49592.995   | 50804.885   |
| 217 | 2-Pyrazoline, 5-ethyl-1,4-dimethyl-      | 72770.827  | 72914.436   | 72842.6315  | 34614.216   | 32198.3985 | 29782.581  | 43600.925  | 36504.793  | 39341.938  | 40904.022  | 41966.646   | 41435.334   |
|     | (3R,6S)-2,2,6-Trimethyl-6-               | 52787070.9 | 54572081.9  | 46579709.1  | 32047446.4  | 38075574.7 | 31344991.1 | 34185565.4 | 31924553.9 | 33776013.1 | 34637605.4 | 35638921.3  | 41484810    |
| 218 | vinyltetrahydro-2H-pyran-3-ol            |            |             |             |             |            |            |            |            |            |            |             |             |
| 219 | Methyl salicylate                        | 59049929.7 | 71913678.1  | 57573260.3  | 35927738.7  | 34515219.5 | 35503988.5 | 32500988.6 | 30617992.2 | 30178248.6 | 53510680.1 | 55902426.7  | 64802388.4  |
| 220 | Citronellyl butyrate                     | 313692.004 | 233521.023  | 273606.5135 | nd          | nd         | nd         | nd         | nd         | nd         | nd         | nd          | nd          |
| 221 | 3-Hexen-1-ol benzoate                    | 113819.22  | 105971.6655 | 98124.111   | 110408.818  | 82402.431  | 82868.701  | 102351.101 | 86126.367  | 92096.022  | 89144.191  | 78743.424   | 83943.8075  |
| 222 | 2-Hexenoic acid, 3-hexenyl ester, (E,Z)- | 119067.74  | 112341.3755 | 105615.011  | 59338.687   | 64318.891  | 48173.371  | 67950.8195 | 67030.237  | 68871.402  | 69191.366  | 65642.318   | 67416.842   |
| 223 | 6-Octen-1-ol, 7-methyl-3-methylene-      | 4189447.57 | 4317017.05  | 4253232.31  | 1682811.25  | 1819086.37 | 1885163.15 | 1989124.51 | 1686393.64 | 1690770.05 | 2027808.58 | 2033692.44  | 2513302.33  |
| 224 | 6-Propenylbicyclo[3.1.0]hexan-2-one      | 362437.745 | 405561.077  | 383999.411  | 153680.888  | 172471.377 | 175387.132 | 184627.469 | 166318.901 | 161148.886 | 184760.589 | 187153.546  | 242054.128  |
| 225 | 1H-Pyrrole-3-carbonitrile                | 256220.988 | 280982.697  | 268601.8425 | nd          | nd         | nd         | nd         | nd         | nd         | 317327.265 | 242780.9435 | 280054.1043 |
|     | 2,5-Cyclohexadien-1-one, 2,6-bis(1,1-    | 85088.04   | 72548.9905  | 60009.941   | 108650.4425 | 105456.249 | 111844.636 | 117358.859 | 94523.41   | 94420.192  | 91459.685  | 92657.896   | 92058.7905  |
| 226 | dimethylethyl)-4-hydroxy-4-methyl-       |            |             |             |             |            |            |            |            |            |            |             |             |
| 227 | Pyrazine, ethyl-                         | 345427.915 | 334188.346  | 344006.567  | 100708.748  | 137858.233 | 107681.178 | 634824.235 | 605720.153 | 724409.762 | 2175514.04 | 2291669.78  | 2706298.82  |
|     | Cyclohexanol, 1-methyl-4-(1-             | 92926.459  | 81939.2755  | 70952.092   | nd          | nd         | nd         | nd         | nd         | nd         | nd         | nd          | nd          |
| 228 | methylethylidene)-, acetate              |            |             |             |             |            |            |            |            |            |            |             |             |
| 229 | 2,4-Decadienal, (E,E)-                   | 361223.13  | 442048.778  | 401635.954  | 236103.498  | 226876.49  | 219388.32  | 256255.29  | 223017.801 | 221786.765 | 249499.047 | 240125.409  | 244812.228  |
| 230 | Ethyl-diethanolamine, O,O'-diacetyl      | 797496.798 | 680818.5345 | 564140.271  | 437401.28   | 425569.841 | 432964.664 | 468876.46  | 449052.094 | 438686.047 | 413116.506 | 365697.075  | 431930.105  |
| 231 | Diethyl Phthalate                        | 111667.269 | 128241.145  | 119954.207  | 85501.0465  | 88526.31   | 82475.783  | 157435.733 | 129363.888 | 149841.512 | 130004.432 | 131208.538  | 130606.485  |
|     | 2-Buten-1-one, 1-(2,6,6-trimethyl-1-     | 139466.091 | 111412.188  | 107082.236  | 100936.097  | 109209.77  | 88486.377  | 80125.411  | 76853.444  | 77656.775  | 53353.415  | 50427.108   | 51890.2615  |
| 232 | cyclohexen-1-yl)-                        |            |             |             |             |            |            |            |            |            |            |             |             |
| 233 | Anethole                                 | 1721347.75 | 1402818.33  | 1562083.04  | 3180770.49  | 2963118.18 | 2660485.83 | 2411277.03 | 2005186.28 | 2222522.01 | 3246639.65 | 2826574.47  | 3036607.06  |

|     |                                                                                                     |            |            |             |            |            |             |             |            |            |            |            |             |
|-----|-----------------------------------------------------------------------------------------------------|------------|------------|-------------|------------|------------|-------------|-------------|------------|------------|------------|------------|-------------|
| 234 | 1H-Benzimidazole, 2-methyl-                                                                         | 23682.448  | 20939.1485 | 18195.849   | nd         | nd         | nd          | 15556.052   | 16373.356  | 14738.748  | nd         | nd         | nd          |
| 235 | Lilac alcohol B                                                                                     | 175931.115 | 155268.851 | 134606.587  | 91777.565  | 107993.614 | 91353.659   | 107035.319  | 96034.017  | 99868.647  | 96319.014  | 100596.655 | 98457.8345  |
| 236 | 1,3-di-iso-propylnaphthalene                                                                        | 186464.611 | 194582.842 | 190523.7265 | 129897.478 | 106942.995 | 93021.809   | 65913.3405  | 69625.945  | 62200.736  | 63448.941  | 61016.982  | 67619.762   |
| 237 | (E)-2,6-Dimethylocta-3,7-diene-2,6-diol                                                             | 11699285.7 | 10228233.2 | 8757180.69  | 7577174.86 | 7601985.48 | 6401860.09  | 7232745.965 | 6853516.7  | 7611975.23 | 5525561.26 | 5400969.56 | 5463265.41  |
| 238 | 2,6,6-Trimethylcyclohexa-1,4-dienecarbaldehyde                                                      | 224252.614 | 289380.949 | 256816.7815 | 150615.591 | 162257.476 | 154736.307  | 154594.363  | 134388.77  | 140931.563 | 148146.616 | 151225.762 | 149686.189  |
| 239 | 2-Butanone, 4-(4-methoxyphenyl)-                                                                    | 43228.486  | 46530.578  | 51412.287   | 29784.109  | 29166.9775 | 28549.846   | 27060.626   | 27503.9815 | 27947.337  | nd         | nd         | nd          |
| 240 | Isophorone                                                                                          | 545003.29  | 668392.674 | 606697.982  | 352107.344 | 487185.566 | 470630.019  | 519786.767  | 548987.937 | 549734.393 | 551279.034 | 442231.303 | 480457.507  |
| 241 | 7-Isoquinolinol, 1,2,3,4-tetrahydro-1-[(3-hydroxy-4-methoxyphenyl)methyl]-6-methoxy-2-methyl-, (S)- | nd         | nd         | nd          | nd         | nd         | nd          | nd          | nd         | nd         | 107439.139 | 94833.718  | 101136.4285 |
| 242 | Butanal, 2-methyl-                                                                                  | 37906157.7 | 37009192.6 | 37457675.15 | 40754634   | 33602503.4 | 44017230.8  | 52997732.2  | 53821536.8 | 53337310.8 | 58854447.9 | 52654274.8 | 53028944.1  |
| 243 | 3-(Hydroxyimino)-6-methylindolin-2-one                                                              | 64411.686  | 65590.295  | 65000.9905  | nd         | nd         | nd          | nd          | nd         | nd         | 42192.013  | 41521.391  | 41856.702   |
| 244 | 3-Methyl-2-(3-methylpentyl)-3-buten-1-ol                                                            | 470695.732 | 423637.12  | 376578.508  | 283165.226 | 338749.528 | 265738.935  | 382774.445  | 319607.325 | 324144.527 | 228378.931 | 218703.968 | 223541.4495 |
| 245 | (Z)-Hex-3-enyl isobutyl carbonate                                                                   | 173775.14  | 130331.355 | 152053.2475 | 121172.884 | 115775.669 | 119743.514  | nd          | nd         | nd         | 134698.835 | 117517.981 | 126108.408  |
| 246 | 2H-1-benzopyran-6-ol, 3,4-dihydro-2,2-dimethyl-4-(1-methylethyl)-                                   | 216520.654 | 217322.789 | 224939.847  | 199010.958 | 214653.407 | 206832.1825 | 120979.713  | 104602.207 | 110575.736 | 107707.819 | 97447.668  | 102577.7435 |
| 247 | 1H-Indole, 2,3-dihydro-4-methyl-                                                                    | 36568.966  | 44328.845  | 40436.891   | 46797.871  | 33613.188  | 38687.012   | 35193.938   | 32530.138  | 35002.164  | 25928.124  | 28023.168  | 26975.646   |
| 248 | Benzyl alcohol                                                                                      | 87261069.3 | 93235536.3 | 73393129.2  | 58736178.1 | 63873248.5 | 55594493.8  | 64238107.5  | 60194494   | 62541555.7 | 58762446.1 | 60890926.5 | 73027411    |
| 249 | 2,5-Pyrrolidinedione, 1-ethyl-                                                                      | 2896215.18 | 3377225.81 | 3136720.495 | 2013335.99 | 1818619.6  | 1835132.1   | 3092534.75  | 2491376.71 | 2631844.49 | 1990269.21 | 1990384.42 | 1990326.815 |
| 250 | Octanal, 7-hydroxy-3,7-dimethyl-                                                                    | 66000.796  | 56359.758  | 46718.72    | nd         | nd         | nd          | nd          | nd         | nd         | nd         | nd         | nd          |
| 251 | 5-Aziridinopentanol                                                                                 | 77962.411  | 69705.703  | 73834.057   | 54932.716  | 67868.465  | 61400.5905  | 55241.443   | 47814.932  | 51528.1875 | 46701.14   | 50618.865  | 48660.0025  |
| 252 | 2,6-Octadienoic acid, 3,7-dimethyl-, (E)-                                                           | 30419390.8 | 38478165.6 | 34448778.2  | 13680416.5 | 12062556.5 | 16669724.3  | 20040588    | 22390457.4 | 17690718.6 | 13674879   | 12205016.2 | 12939947.6  |

|     |                                                                                                       |             |             |            |             |            |            |            |             |            |            |             |             |
|-----|-------------------------------------------------------------------------------------------------------|-------------|-------------|------------|-------------|------------|------------|------------|-------------|------------|------------|-------------|-------------|
| 253 | Fumaric acid, isoheptyl pent-4-en-2-yl ester                                                          | 100408.209  | 88853.369   | 90316.734  | 67881.167   | 61556.64   | 55232.113  | 68168.07   | 67732.976   | 67297.882  | 57935.325  | 61223.931   | 59579.628   |
| 254 | 3,7,11-Trimethyl-dodeca-2,6,10-trienoic acid                                                          | 489440.24   | 539653.988  | 514547.114 | 226203.914  | 248967.672 | 250702.76  | 299676.927 | 247786.715  | 258444.218 | 238470.644 | 220792.169  | 229631.4065 |
| 255 | (3R,3aR,3bR,4S,7R,7aR)-4-Isopropyl-3,7-dimethyloctahydro-1H-cyclopenta[1,3]cyclopropa[1,2]benzen-3-ol | 173547.957  | 153085.2355 | 132622.514 | 94387.433   | 109943.809 | 124844.72  | 127954.4   | 121411.85   | 104642.254 | 77597.69   | 64972.179   | 71284.9345  |
| 256 | Phenylethyl Alcohol                                                                                   | 91462554.7  | 101647723   | 78774102   | 66130735.8  | 70565730.3 | 62526101.3 | 71266795.8 | 64985965.1  | 68000514.5 | 64102987.1 | 65820802.5  | 81704918.6  |
| 257 | Propanoic acid, 2-methyl-, 2-methylbutyl ester                                                        | 844003.465  | 940600.686  | 724364.543 | 297830.724  | 248605.771 | 347055.677 | 555038.113 | 502473.3525 | 449908.592 | 322090.495 | 235654.18   | 320142.376  |
| 258 | (1R)-2,6,6-Trimethylbicyclo[3.1.1]hept-2-ene                                                          | 5778663.51  | 5540104.59  | 5301545.67 | 3076728.975 | 3003148.51 | 3150309.44 | 3549764.86 | 3106086.78  | 2785587.57 | 1996565.87 | 1842285.285 | 1688004.7   |
| 259 | 7-epi-a-Eudesmol                                                                                      | 542723.076  | 492747.5125 | 442771.949 | 387973.707  | 355512.743 | 370448.148 | 409662.936 | 355818.662  | 338804.033 | 293988.389 | 269111.307  | 281549.848  |
| 260 | Terephthalic acid, hexyl tridec-2-yn-1-yl ester                                                       | 105134      | 108780      | 107106     | 109611.4315 | 111380.001 | 107842.862 | 107415     | 106895      | 106207.117 | 105588.999 | 104146      | 102904.649  |
| 261 | Neophytadiene                                                                                         | 114475.0005 | 114036.531  | 114913.47  | 156270.259  | 130939.626 | 128994.143 | 162320.853 | 140535.972  | 146258.278 | 143826.916 | 127701.605  | 135764.2605 |
| 262 | 2,9-Heptadecadiene-4,6-diyn-8-ol, (Z,E)-                                                              | 219365.417  | 193912.111  | 168458.805 | 87295.852   | 95908.633  | 104419.821 | 187615.693 | 165124.213  | 166974.833 | 203791.464 | 202509.749  | 203150.6065 |
| 263 | Cyclopentanecarboxylic acid, 2-tetrahydrofurylmethyl ester                                            | 76248.573   | 65250.085   | 54251.597  | nd          | nd         | nd         | 72000.39   | 74668.682   | 70027.812  | 100244.624 | 75091.62    | 87668.122   |
| 264 | 2-Cyclopenten-1-one, 3-methyl-2-(2-pentenyl)-, (Z)-                                                   | 3134785.37  | 2820322.07  | 2505858.77 | 2199141.11  | 2231056.21 | 2160728.93 | 2635640.09 | 2232743.78  | 2313483.66 | 2208793.33 | 2238380.41  | 2223586.87  |
| 265 | Homovanillyl alcohol                                                                                  | 85222.251   | 73599.522   | 79410.8865 | 44280.772   | 38013.0385 | 31745.305  | nd         | nd          | nd         | nd         | nd          | nd          |
| 266 | Tricyclo[6.3.0.0(2,7)]undecane-1,3,7-triol                                                            | 27011.195   | 23972.9585  | 20934.722  | 17534.916   | 19942.172  | 15127.66   | 33128.569  | 30497.981   | 31757.1    | 28415.896  | 22424.372   | 25420.134   |
| 267 | Hexanoic acid, 2-ethyl-                                                                               | 1128571.82  | 1246233.22  | 956031.049 | 1167147.12  | 1131394.13 | 1226617.66 | 1389137.91 | 1274557.65  | 1228369.92 | 1278307.46 | 1264209.05  | 1301932.71  |
| 268 | Ethyl (E)-hex-3-enyl carbonate                                                                        | 1105989.85  | 1388757.17  | 1247373.51 | 773394.859  | 773722.022 | 689846.947 | nd         | nd          | nd         | 727176.746 | 719177.737  | 723177.2415 |

|     |                                                                   |            |             |             |             |            |            |            |            |            |            |             |             |
|-----|-------------------------------------------------------------------|------------|-------------|-------------|-------------|------------|------------|------------|------------|------------|------------|-------------|-------------|
| 269 | 1-Hepten-3-one                                                    | 216145.273 | 211165.708  | 213655.4905 | 61505.965   | 61558.114  | 74204.035  | 64855.386  | 60845.405  | 68865.367  | 79774.628  | 72919.646   | 76347.137   |
| 270 | 2,7-Octadiene-1,6-diol, 2,6-dimethyl-                             | 237038.275 | 213567.946  | 190097.617  | 190258.225  | 141343.833 | 148978.593 | 207548.23  | 157051.218 | 171270.862 | 123635.132 | 129467.856  | 126551.494  |
| 271 | Ethanone, 1-(1H-pyrrol-2-yl)-                                     | 658253.246 | 813665.666  | 735959.456  | nd          | nd         | nd         | nd         | nd         | nd         | 1999740.85 | 2230081.31  | 2114911.08  |
| 272 | 2-Hexenoic acid, (E)-                                             | 49060574.1 | 43707600.75 | 38354627.4  | 24281538.3  | 27334520.9 | 23588515.9 | 33449199   | 28814103.4 | 31652574.2 | 23915711.9 | 24541710.5  | 24228711.2  |
| 273 | Hexenyl tiglate, 4Z-                                              | 64518.794  | 73370.179   | 58688.799   | 40189.321   | 41649.273  | 42862.581  | nd         | nd         | nd         | nd         | nd          | nd          |
| 274 | Naphthalene, 1,6-dimethyl-4-(1-methylethyl)-                      | 1046198.99 | 1098666.55  | 837307.877  | 827154.878  | 681209.657 | 599738.033 | 574197.139 | 497596.896 | 473398.777 | 444544.366 | 418148.524  | 495040.717  |
| 275 | N,N,N'-Trimethyl-1,4-phenylenediamine                             | 47196.219  | 45343.8425  | 43491.466   | nd          | nd         | nd         | 41745.97   | 41428.31   | 41587.14   | nd         | nd          | nd          |
| 276 | N-Methyl-N-methoxy-5,6,7,8-tetrahydro-1-naphtamide                | 64272.057  | 63052.63    | 60861.341   | 66946.579   | 61443.157  | 64194.868  | 55645.854  | 50387.358  | 48566      | 47309.181  | 44076.414   | 45692.7975  |
| 277 | 2-Methylbenzyl p-toluate                                          | 525690.099 | 509352.7775 | 493015.456  | 351886.504  | 396075.311 | 349256.447 | 400108.264 | 374278.763 | 395338.943 | 444652.483 | 448339.989  | 559427.638  |
| 278 | 1,5-Cyclodecadiene, 1,5-dimethyl-8-(1-methylethenyl)-, [S-(Z,E)]- | 744571.105 | 833483.302  | 789027.2035 | 486196.401  | 483121.936 | 403847.811 | 488273.163 | 458325.976 | 477161.021 | 592916.518 | 564685.44   | 578800.979  |
| 279 | Acetic acid, 2-phenylethyl ester                                  | 1014757.33 | 1182397.02  | 846731.037  | 590738.498  | 582841.094 | 561472.972 | 610978.665 | 563836.247 | 572840.273 | 795608.923 | 787879.108  | 991769.821  |
| 280 | Phenol, 2-methyl-                                                 | 314554.774 | 275828.606  | 295191.69   | 172197.3525 | 190434.272 | 153960.433 | 179096.958 | 144713.514 | 154620.134 | 157436.207 | 155919.251  | 156677.729  |
| 281 | Phenol                                                            | 2866644.24 | 2923677.2   | 2895160.72  | 2728826.18  | 2668736.45 | 2354263.46 | 2443730.87 | 2170101.24 | 2232265.52 | 1542973.91 | 1570152.98  | 1913221.8   |
| 282 | (E)-4,8-Dimethylnona-1,3,7-triene                                 | 347620.649 | 298525.17   | 249429.691  | 185032.9685 | 183736.589 | 186329.348 | 186278.436 | 179545.048 | 193011.824 | 187428.313 | 256557.2075 | 221992.7603 |
| 283 | 1,4-Methanonaphthalen-9-ol, 1,2,3,4-tetrahydro-, acetate, syn-    | 28428.144  | 28185.9695  | 27943.795   | 29542.535   | 26498.931  | 28020.733  | 23457.028  | 19158.933  | 23230.888  | 28680.724  | 30703.312   | 38851.071   |
| 284 | 2-Butenal, 2-methyl-4-(2,6,6-trimethyl-1-cyclohexen-1-yl)-        | 13949.543  | 12134.3585  | 10319.174   | nd          | nd         | nd         | 11676.96   | 12786.989  | 11784.44   | nd         | nd          | nd          |
| 285 | Propan-2-one, 1-(4-isopropoxy-3-methoxyphenyl)-                   | 129702.649 | 111479.7905 | 93256.932   | 43602.2525  | 48244.934  | 38959.571  | nd         | nd         | nd         | nd         | nd          | nd          |
| 286 | 2-Benzylidenecyclohexanol                                         | 102359.16  | 111836.833  | 107097.9965 | 60990.7935  | 70073.132  | 51908.455  | 76272.254  | 60722.786  | 68497.52   | 50915.828  | 48889.301   | 49902.5645  |
| 287 | 2,3-Dimethyl-undec-1-en-3-ol                                      | 348451.617 | 421892.644  | 385172.1305 | 266137.139  | 292601.068 | 239673.21  | 310346.565 | 255277.721 | 271878.724 | 251055.423 | 233996.699  | 242526.061  |
| 288 | dl-Menthol                                                        | 84356.436  | 83357.1865  | 82357.937   | 111310.909  | 95783.4425 | 80255.976  | 83222.127  | 78010.126  | 85976.099  | 144553.973 | 89561.885   | 117057.929  |

|     |                                                                                                  |            |             |             |            |             |            |             |            |            |            |            |             |
|-----|--------------------------------------------------------------------------------------------------|------------|-------------|-------------|------------|-------------|------------|-------------|------------|------------|------------|------------|-------------|
| 289 | 1,7-Octanediol, 3,7-dimethyl-                                                                    | 24658.154  | 28676.296   | 20640.012   | nd         | nd          | nd         | 25947.707   | 26882.8395 | 27817.972  | nd         | nd         | nd          |
| 290 | Furan, 2-pentyl-                                                                                 | 1572139.45 | 1946598.96  | 1759369.205 | 581426.096 | 632822.577  | 602806.533 | 541848.4675 | 529172.659 | 554524.276 | 559827.709 | 577981.156 | 568904.4325 |
| 291 | Bicyclo[3.1.1]hept-2-ene-2-methanol, 6,6-dimethyl-                                               | 146444.861 | 143861.21   | 145153.0355 | 72102.035  | 72089.963   | 60159.551  | 66451.324   | 53869.332  | 58536.782  | 70845.554  | 72644.394  | 87106.175   |
| 292 | Tricyclo[4.3.1.0(3,8)]dec-4-en-10-benzyl ether                                                   | 33669.451  | 34436.484   | 26227.679   | nd         | nd          | nd         | 32683.282   | 25372.642  | 26123.272  | 46377.476  | 45525.981  | 45951.7285  |
| 293 | 1-Butanol, 3-methyl-, nitrate                                                                    | 185827.381 | 167388.651  | 148949.921  | 73095.384  | 85982.9435  | 98870.503  | 119121.8895 | 99390.323  | 138853.456 | 52271.04   | 38400.947  | 45335.9935  |
| 294 | Ethanone, 1-(3-hydroxy-4-methoxyphenyl)-                                                         | 392288.22  | 391131.875  | 391710.0475 | 229628.671 | 207122.53   | 190114.523 | 171600.013  | 158233.006 | 146031.591 | 136704.666 | 132091.996 | 145593.521  |
| 295 | Bicyclo[3.2.2]non-6-ene-6-carboxylic acid, 8-(3,4-dimethoxyphenyl)-9-methyl-3-oxa-, methyl ester | 37557.141  | 38531.3775  | 39505.614   | 40698.866  | 39091.881   | 35503.521  | 48664.398   | 42508.6155 | 36352.833  | 32118.355  | 30734.754  | 31426.5545  |
| 296 | 4,7,7-Trimethylbicyclo[4.1.0]hept-3-en-2-one                                                     | 67258.429  | 67030.395   | 66802.361   | 59270.044  | 54583.758   | 50929.122  | 51440.044   | 46810.094  | 49125.069  | 50591.64   | 51328.029  | 50959.8345  |
| 297 | (6-Hydroxymethyl-2,3-dimethylphenyl)methanol                                                     | 43612.174  | 52816.334   | 48214.254   | 69005.965  | 80176.952   | 57834.978  | 49116.984   | 44587.85   | 53976.484  | 74914.398  | 79034.891  | 76974.6445  |
| 298 | Geraniol                                                                                         | 52630996.9 | 59167048.5  | 55899022.7  | 35180427.7 | 36796406.1  | 37544221.2 | 40428126.1  | 35661577.5 | 35890611.9 | 37846989   | 38417444   | 45208425.5  |
| 299 | Epicubenol                                                                                       | 201494.939 | 214676.193  | 170338.649  | 155511.646 | 152864.197  | 162502.458 | 163042.286  | 154607.664 | 146561.235 | 141717.467 | 126669.581 | 134193.524  |
| 300 | p-Mentha-1,8-dien-7-ol                                                                           | 127273.21  | 133761.377  | 130517.2935 | 108346.386 | 103414.504  | 82827.086  | 103502.473  | 85204.093  | 91556.046  | 81224.276  | 81713.497  | 81468.8865  |
| 301 | Butanamide, N-(3-methylphenyl)-                                                                  | 20821.57   | 21489.4255  | 22157.281   | nd         | nd          | nd         | nd          | nd         | nd         | nd         | nd         | nd          |
| 302 | 2-Cyclohexen-1-ol, 3,5,5-trimethyl-                                                              | 145901.675 | 174879.822  | 160390.7485 | 111564.401 | 106346.875  | 90061.52   | 86614.1585  | 83547.133  | 89681.184  | 97441.962  | 96672.873  | 97057.4175  |
| 303 | 5-Methyl-2-phenyl-2-hexenal                                                                      | 202827.189 | 181878.0835 | 160928.978  | 105468.948 | 102734.369  | 103791.177 | 203894.153  | 171628.684 | 180193.631 | 171436.393 | 177236.855 | 174336.624  |
| 304 | Cyclohexanone, 5-methyl-2-(1-methylethyl)-, trans-                                               | 2775542.93 | 2669185.335 | 2562827.74  | 1471062.9  | 2018588.24  | 1905920.08 | 2022269.78  | 2155858.16 | 2115640.07 | 3126224.79 | 2193929.69 | 2660077.24  |
| 305 | p-Cresol                                                                                         | 217951.432 | 222318.538  | 220134.985  | 155292.82  | 138126.869  | 118988.163 | 164391.17   | 146945.337 | 129499.504 | 123660.169 | 132166.328 | 127913.2485 |
| 306 | Isopentyl hexanoate                                                                              | 1932298.96 | 1662828.01  | 1393357.06  | 918402.044 | 853613.6835 | 788825.323 | nd          | nd         | nd         | 1526013.04 | 1053893.03 | 1289953.035 |

|     |                                                                                                                                                                       |             |             |             |            |            |            |            |            |            |            |            |             |
|-----|-----------------------------------------------------------------------------------------------------------------------------------------------------------------------|-------------|-------------|-------------|------------|------------|------------|------------|------------|------------|------------|------------|-------------|
| 307 | 2-(1-Methylcyclopentyloxy)-<br>tetrahydropyran                                                                                                                        | 330442.052  | 291475.027  | 252508.002  | 174325.38  | 165909.467 | 162293.077 | 131167.563 | 132529.046 | 129806.08  | 146406.675 | 167238.604 | 209555.038  |
| 308 | Hexanoic acid, 3,7-dimethyl-2,6-<br>octadienyl ester, (E)-                                                                                                            | 142832.0185 | 156390.315  | 129273.722  | 68943.573  | 78302.441  | 71893.396  | 85548.478  | 64864.291  | 84277.925  | 62250.419  | 58222.779  | 60236.599   |
| 309 | Fragranyl isobutyrate                                                                                                                                                 | 126796.703  | 116472.711  | 121634.707  | nd          |
| 310 | p-Cymen-7-ol                                                                                                                                                          | 1059167.46  | 940356.546  | 821545.632  | 749839.904 | 754529.817 | 696367.522 | 901529.839 | 740563.117 | 774745.766 | 666049.059 | 664386.193 | 665217.626  |
| 311 | 1H-Indene-4-carboxylic acid, 2,3-<br>dihydro-1,1-dimethyl-<br>(E)-5-((1R,3R,6S)-2,3-<br>Dimethyltricyclo[2.2.1.0 <sup>2,6</sup> ]heptan-3-yl)-<br>2-methylpent-2-enal | 88348.763   | 87570.41    | 78569.501   | 70410.217  | 68395.714  | 69402.9655 | 71608.782  | 64861.317  | 78356.247  | 120339.6   | 132070.612 | 169115.303  |
| 312 |                                                                                                                                                                       | 231663.39   | 228453.861  | 225244.332  | 213250.183 | 205640.462 | 214227.963 | 213151.268 | 227130.578 | 207258.748 | 267888.21  | 244615.418 | 321686.966  |
| 313 | 3,5-Octadien-2-one                                                                                                                                                    | 815014.205  | 887808.538  | 851411.3715 | 500159.969 | 536245.867 | 475029.524 | 469684.468 | 424271.782 | 441739.165 | 650085.702 | 630826.203 | 792953.181  |
| 314 | 2-Methylbenzyl benzoate                                                                                                                                               | 203129.262  | 191583.6485 | 180038.035  | 155579.212 | 156490.788 | 148970.854 | 146142.006 | 129504.868 | 131319.771 | 162085.8   | 168725.83  | 207703.491  |
| 315 | cis-p-Mentha-2,8-dien-1-ol                                                                                                                                            | 861070.797  | 1030389.77  | 945730.2835 | 595297.924 | 596168.806 | 545586.697 | 542351.949 | 490188.012 | 512281.117 | 786741.233 | 838265.708 | 959002.274  |
| 316 | 1,4-Benzenedicarboxaldehyde                                                                                                                                           | 145235.683  | 147560.133  | 146397.908  | 89866.902  | 93689.669  | 86044.135  | 90771.147  | 81191.842  | 69676.165  | 82203.887  | 77573.694  | 79888.7905  |
| 317 | Indole-3-carboxaldehyde, 1-(4-<br>fluorobenzyl)-2-methyl-                                                                                                             | 24269.381   | 21455.892   | 18642.403   | nd         | nd         | nd         | 23125.532  | 22007.618  | 20889.704  | 19320.549  | 16408.886  | 17864.7175  |
| 318 | Valeric acid, 4-nitrophenyl ester                                                                                                                                     | 62480.1735  | 67048.777   | 57911.57    | 30498.232  | 36340.013  | 42181.794  | nd         | nd         | nd         | nd         | nd         | nd          |
| 319 | Cyclohexanone, 4-hydroxy-4-methyl-                                                                                                                                    | 1413088.81  | 1396761.16  | 1265188.64  | 814142.069 | 1104979.91 | 892822.726 | 979376.429 | 956492.053 | 1034022.08 | 839481.68  | 834537.354 | 942524.154  |
| 320 | 2-Heptanone                                                                                                                                                           | 126943.838  | 97647.233   | 109689.99   | 69867.16   | 79475.932  | 80339.486  | 82384.6765 | 87284.438  | 77484.915  | 138389.028 | 123879.148 | 109929.188  |
| 321 | 2-Pentadecanone, 6,10,14-trimethyl-                                                                                                                                   | 328875.625  | 361209.747  | 296395.472  | 376666.193 | 391909.529 | 458389.995 | 367899.558 | 423712.484 | 383272.395 | 442719.905 | 400825.965 | 485390.374  |
| 322 | 2-Cyclopenten-1-one, 3-methyl-2-(1,3-<br>pentadienyl)-, (E,Z)-                                                                                                        | 165639.104  | 142808.3635 | 119977.623  | 129053.798 | 119292.33  | 108355.145 | 136470.647 | 109655.444 | 121589.628 | 98002.504  | 102757.037 | 100379.7705 |
| 323 | Pivalic acid, 2-methylpropyl ester                                                                                                                                    | 113368.31   | 103357.446  | 93346.582   | nd         | nd         | nd         | 99099.677  | 83121.311  | 91110.494  | nd         | nd         | nd          |
| 324 | 5-Hepten-2-one, 6-methyl-                                                                                                                                             | 3275369.15  | 3095763.595 | 2916158.04  | 1961090.19 | 2281321.05 | 2189919.02 | 2564195.06 | 2474591.66 | 2514403.78 | 3506224.94 | 3230284.59 | 3948704.18  |
| 325 | 1,3-Benzenediol, 5-pentyl-                                                                                                                                            | 2794188.3   | 2554197.46  | 2314206.62  | 2937949.3  | 2668806.2  | 2503364.98 | 3386653.67 | 3085854.55 | 3061410.21 | 2397366.85 | 2203888.39 | 2300627.62  |



|     |                                                                            |            |             |             |            |             |             |            |            |            |            |            |             |
|-----|----------------------------------------------------------------------------|------------|-------------|-------------|------------|-------------|-------------|------------|------------|------------|------------|------------|-------------|
| 326 | 2,2-Dipropyl-N-ethylpiperidine                                             | 53812.787  | 53735.0745  | 53657.362   | 44635.053  | 51306.937   | 47970.995   | 42723.015  | 37314.319  | 39817.673  | 35688.02   | 41559.456  | 38623.738   |
| 327 | 3-(2-Isopropyl-5-methylphenyl)-2-methylpropionic acid                      | 114844.139 | 112915.458  | 89773.204   | 65494.182  | 63286.344   | 51218.783   | 92335.563  | 70849.167  | 77217.928  | 125601.483 | 141086.109 | 161704.373  |
| 328 | Formamide, N-phenyl-                                                       | 168472.157 | 159512.5495 | 150552.942  | 121949.947 | 130397.235  | 112656.915  | 158571.515 | 134645.381 | 152212.999 | 86501.711  | 80162.327  | 83332.019   |
| 329 | 1H-2-Benzopyran-1-one, 3,4-dihydro-8-hydroxy-3-methyl-                     | 408242.028 | 391250.631  | 399746.3295 | 266701.581 | 226551.101  | 209386.113  | 187390.68  | 164920.093 | 153716.028 | 149394.07  | 148933.383 | 154104.749  |
| 330 | (1R,4S,9aS)-1-Methyl-4-((Z)-pent-2-en-4-yn-1-yl)octahydro-1H-quinolizine   | 386284.262 | 376277.114  | 340783.133  | 288398.395 | 280981.356  | 229130.693  | 361763.214 | 286197.898 | 313396.884 | 361942.269 | 377522.62  | 369732.4445 |
| 331 | Indolizine, 3-methyl-                                                      | 37630.166  | 45489.851   | 41560.0085  | nd         | nd          | nd          | 57343.52   | 53830.676  | 55561.704  | 47816.419  | 50676.643  | 49246.531   |
| 332 | 3,4-Methylpropylsuccinimide                                                | 58604.989  | 69206.47    | 52491.198   | 56266.5825 | 54311.495   | 58221.67    | 61280.819  | 59092.141  | 61139.335  | 55746.419  | 54289.637  | 67754.195   |
| 333 | 3-(2,6,6-Trimethyl-cyclohex-1-enyl)-propionic acid, methyl ester           | nd         | nd          | nd          | 115907.074 | 102801.087  | 109354.0805 | nd         | nd         | nd         | 69437.093  | 77879.908  | 73658.5005  |
| 334 | 8-Hexadecenal, 14-methyl-, (Z)-                                            | 161146.667 | 167797.653  | 149761.86   | 401866.883 | 359960.513  | 443773.253  | 380634.862 | 475309.01  | 436762.934 | 518573.715 | 418774.256 | 528373.074  |
| 335 | 4-Hexenoic acid                                                            | 18024176.7 | 18886439.5  | 18455308.1  | 9159626.78 | 12634167.4  | 11474998.6  | 14692769.9 | 12110901.5 | 13494096.2 | 11625165.6 | 10262684.8 | 10943925.2  |
| 336 | Methacrolein                                                               | 194960.629 | 176493.6035 | 158026.578  | 166627.21  | 229546.088  | 197765.54   | 210723.698 | 229610.454 | 225239.858 | 197626.871 | 167353.705 | 220514.46   |
| 337 | Hexadecanoic acid, methyl ester                                            | 470374.636 | 471314.447  | 360605.066  | 322325.921 | 283522.63   | 273271.73   | 269982.966 | 237099.833 | 225379.736 | 194675.596 | 185174.443 | 238786.493  |
| 338 | Pentadecanoic acid, 14-methyl-, methyl ester                               | 450211.489 | 405330.369  | 380078.552  | 229151.94  | 258887.9625 | 288623.985  | 243381.411 | 263707.44  | 225200.984 | 511633.428 | 384965.048 | 448299.238  |
| 339 | 1-(7-Hydroxy-1,6,6-trimethyl-10-oxatricyclo[5.2.1.0(2,4)]dec-9-yl)ethanone | 59779.858  | 69212.144   | 64496.001   | 36517.0215 | 35755.171   | 37278.872   | 70264.248  | 63030.242  | 60155.038  | 108793.312 | 99242.973  | 130664.304  |
| 340 | 2-Phenyl-2,4-octadienol                                                    | 26488.002  | 25355.836   | 21661.681   | 15267.637  | 14963.603   | 15072.941   | 16457.923  | 15501.307  | 15979.615  | 17227.979  | 16672.501  | 16950.24    |
| 341 | Benzo[b]thiophene, 2-ethyl-                                                | 32442.449  | 33128.973   | 29531.543   | 28883.472  | 29002.651   | 28265.366   | 28560.289  | 24753.884  | 25848.724  | 24121.666  | 23546.982  | 31570.579   |
| 342 | 3-Buten-2-ol, 4-(2,6,6-trimethyl-2-cyclohexen-1-yl)-, (3E)-                | 49883.768  | 55012.276   | 44181.31    | 42223.417  | 31569.094   | 35897.272   | 37369.8015 | 38202.015  | 36537.588  | 35217.419  | 30978.247  | 33097.833   |
| 343 | 2H-Pyran-2-one, tetrahydro-6-(2-pentenyl)-, (Z)-                           | 1032792.42 | 948722.728  | 864653.036  | 817600.617 | 744340.497  | 677380.899  | 1002943.31 | 782512.112 | 825242.58  | 653955.955 | 620690.724 | 637323.3395 |

|     |                                                              |            |             |             |            |             |             |             |            |            |            |             |             |
|-----|--------------------------------------------------------------|------------|-------------|-------------|------------|-------------|-------------|-------------|------------|------------|------------|-------------|-------------|
| 344 | Maltol                                                       | nd         | nd          | nd          | nd         | nd          | nd          | 10144.9455  | 11761.757  | 8528.134   | 24453.246  | 28957.403   | 26705.3245  |
| 345 | Carbonic acid, tridecyl vinyl ester                          | 41362.272  | 42544.0555  | 43725.839   | 44214.526  | 46779.213   | 34245.85    | 44253.715   | 34135.782  | 39194.7485 | 30065.27   | 25795.264   | 33937.068   |
| 346 | 4-Isopropyl-1,6-dimethyl-1,2,3,4-tetrahydronaphthalene       | 112772.1   | 119887.3335 | 127002.567  | 138348.765 | 139713.08   | 139030.9225 | 69528.827   | 60064.353  | 61488.28   | 68616.214  | 58309.853   | 82654.568   |
| 347 | 2,6,10-Dodecatrien-1-ol, 3,7,11-trimethyl-                   | 32989.862  | 40996.502   | 36993.182   | 16890.563  | 14679.812   | 15785.1875  | nd          | nd         | nd         | nd         | nd          | nd          |
| 348 | 2-Cyclohexen-1-one, 4-(3-hydroxy-1-butenyl)-3,5,5-trimethyl- | 143171.257 | 121856.169  | 100541.081  | nd         | nd          | nd          | 43903.587   | 37907.825  | 31912.063  | nd         | nd          | nd          |
| 349 | 2,6-Octadien-1-ol, 3,7-dimethyl-, (Z)-                       | 12070936.2 | 10427402.24 | 8783868.28  | 5934448    | 6456974.3   | 6624487.18  | 7074361.28  | 6015757.91 | 6095314.95 | 7068473.38 | 7120420.62  | 8835884.76  |
| 350 | Azulene, 1,4-dimethyl-7-(1-methylethyl)-                     | 188670.716 | 188803.827  | 188737.2715 | 93312.265  | 102052.043  | 84572.487   | 64629.597   | 68541.189  | 60718.005  | 56325.386  | 54453.437   | 58261.136   |
| 351 | Hexahydro-3-butylphthalide                                   | 43624.004  | 47798.9395  | 51973.875   | 67137.1    | 62452.566   | 64794.833   | 40304.504   | 37693.519  | 35082.534  | 31356.828  | 35238.058   | 33852.864   |
| 352 | 2,4-Di-tert-butylphenol                                      | 5079368.68 | 5651209.83  | 4968279.86  | 6617652.56 | 6231442.6   | 7003862.52  | 11284511.2  | 9676189.88 | 8740794.95 | 8049714.03 | 9678149.55  | 8863931.79  |
| 353 | Farnesol, acetate                                            | 600474.37  | 524518.646  | 448562.922  | 417433.032 | 375374.995  | 316341.869  | 304271.6995 | 302321.211 | 306222.188 | 319886.347 | 434331.2105 | 377108.7788 |
| 354 | Triethylene glycol                                           | 148296.106 | 132707.558  | 130748.061  | 130890.601 | 119610.658  | 131516.387  | 121152.65   | 126286.523 | 101900.731 | 114366.06  | 103695.226  | 118903.623  |
| 355 | Methyl jasmonate                                             | 199475.293 | 221975.315  | 173471.363  | 178159.895 | 176944.852  | 207063.036  | 186376.903  | 232478.351 | 195908.162 | 232446.606 | 208571.876  | 267921.884  |
| 356 | 2-Pentenal, (E)-                                             | 3353398.95 | 3285954.23  | 3218509.51  | 2503853.52 | 2780551.88  | 2698877.72  | 2233921.49  | 2571341.76 | 2572284.59 | 2340289.55 | 2184770.44  | 2391246.24  |
| 357 | Platambin                                                    | 26180.127  | 24332.698   | 25256.4125  | 18874.297  | 19840.038   | 16094.939   | nd          | nd         | nd         | nd         | nd          | nd          |
| 358 | 2-Methyl-4-pentenoic acid                                    | 290606.01  | 264991.2405 | 239376.471  | 133795.679 | 136410.7275 | 139025.776  | nd          | nd         | nd         | nd         | nd          | nd          |
| 359 | 2,4,6-Octatriene, 2,6-dimethyl-, (E,Z)-                      | 245321.473 | 290267.1955 | 335212.918  | 249541.07  | 255143.715  | 241399.43   | 177363.073  | 201377.175 | 230166.643 | 211815.942 | 226337.863  | 231627.68   |
| 360 | 8-Hydroxy-2,6-dimethylocta-2,6-dienoic acid, ethyl ester     | 58045.103  | 51979.0935  | 45913.084   | 56815.187  | 45626.97    | 42297.044   | 49402.763   | 50926.562  | 47878.964  | 35415.201  | 32968.952   | 34192.0765  |
| 361 | 3-Buten-2-one, 4-(2,6,6-trimethyl-1-cyclohexen-1-yl)-        | 11028001.5 | 9549464.425 | 8070927.35  | 5722166.72 | 6472572.37  | 6762892.09  | 8545570.49  | 7586116.54 | 7463912.65 | 6552809.81 | 5990072.44  | 6271441.125 |
| 362 | 3,3-Diethyl-pyrrolidine-2,4-dione                            | 475735.615 | 429670.81   | 452703.2125 | 556636.043 | 465782.85   | 574037.381  | 640314.162  | 648415.798 | 607222.261 | 678843.572 | 775611.185  | 727227.3785 |
| 363 | Benzoic acid, 2-hydroxy-4-methoxy-6-methyl-, methyl ester    | 1283743.76 | 1321135.06  | 1061014.06  | 984048.647 | 837018.598  | 793180.067  | 724169.89   | 651151.809 | 611282.566 | 607045.519 | 578906.254  | 635024.622  |
| 364 | Isoaromadendrene epoxide                                     | 73237.472  | 66519.957   | 56007.408   | 48651.623  | 44019.888   | 44883.51    | 40034.593   | 30673.131  | 35353.862  | 10124.4135 | 9930.65     | 10318.177   |

|     |                                                                                                                                            |            |            |             |            |            |            |            |            |            |            |            |             |
|-----|--------------------------------------------------------------------------------------------------------------------------------------------|------------|------------|-------------|------------|------------|------------|------------|------------|------------|------------|------------|-------------|
| 365 | 4a,7a-Epoxy-5H-cyclopenta[a]cyclopropa[f]cycloundec-4(1H)-one, 2,7,10,11-tetrakis(acetyloxy)decahydro-8,9-dihydroxy-1,1,3,6,9-pentamethyl- | 88948.697  | 96243.595  | 71722.894   | 77136.587  | 63085.081  | 59692.51   | 77214.225  | 64782.09   | 69911.768  | 46637.155  | 45150.905  | 45894.03    |
| 366 | Benzaldehyde, 3-methyl-                                                                                                                    | 1454016.36 | 1292578.33 | 1352374.1   | 1107167.48 | 1197533.29 | 896871.192 | 1114158.68 | 930190.001 | 1056995.71 | 1114074.56 | 1205534.39 | 1463472.99  |
| 367 | Isoelemicin                                                                                                                                | 190905.478 | 194750.973 | 192828.2255 | nd         | nd         | nd         | 90720.042  | 80212.704  | 78434.08   | 70097.879  | 67380.76   | 71615.112   |
| 368 | (-)-Myrtenol                                                                                                                               | 3076959.74 | 3311444.54 | 3194202.14  | 1636524.75 | 1795688.01 | 1791034.95 | 1765342.46 | 1609246.39 | 1609628.4  | 1888939.34 | 1913032.23 | 2189795.24  |
| 369 | Quinoxaline-6-carboxylic acid,(1-oxo-1,3-dihydroisobenzofuran-5-yl)amide                                                                   | 51348.236  | 55457.296  | 43589.78    | 41603.136  | 35810.73   | 38706.933  | 58125.586  | 50921.395  | 47752.596  | 40648.367  | 39976.114  | 40312.2405  |
| 370 | Coumarin                                                                                                                                   | 1244577.22 | 1415414.21 | 1132036.26  | 1173586    | 1038869.43 | 1009702.08 | 1179779.34 | 1033003.68 | 1082424.64 | 946409.14  | 926276.646 | 1274003.19  |
| 371 | Furan, 2-ethyl-5-methyl-                                                                                                                   | 26474.415  | 23755.849  | 21037.283   | 21052.519  | 26426.49   | 23739.5045 | 19961.5635 | 16885.748  | 23037.379  | nd         | nd         | nd          |
| 372 | n-Butyl cinnamate                                                                                                                          | 21909.365  | 26613.852  | 20323.844   | 16036.073  | 14597.954  | 13159.835  | 14473.782  | 14453.756  | 14493.808  | 15005.01   | 13926.802  | 16419.311   |
| 373 | 3-(4-Amino-phenyl)-2-(toluene-4-sulfonylamino)-propionic acid                                                                              | 125332.092 | 148018.907 | 170705.722  | 61782.702  | 63310.662  | 60254.742  | 91237.0255 | 80636.741  | 101837.31  | 77636.631  | 56136.473  | 66886.552   |
| 374 | 1H-Indene-1,3(2H)-dione, 2-(2-methylbutylidene)-                                                                                           | 39205.564  | 36203.967  | 37704.7655  | nd          |
| 375 | Benzoic acid, nonadecyl ester                                                                                                              | 11008.93   | 13245.512  | 12795.057   | nd         | nd         | nd         | 20225.24   | 20335.959  | 20114.521  | 18732.671  | 16175.105  | 21290.237   |
| 376 | 3-Octanol                                                                                                                                  | 708206.832 | 814042.724 | 761124.778  | 432209.004 | 578062.899 | 569141.947 | 633677.388 | 694747.1   | 658338.534 | 923029.379 | 712666.444 | 817847.9115 |
| 377 | 3-Methylene-1-oxa-spiro[4.5]decan-2-one                                                                                                    | 72889.846  | 78285.338  | 75587.592   | 55223.008  | 47808.3485 | 40393.689  | 56943.354  | 43972.973  | 46686.371  | 43900.848  | 25996.416  | 34948.632   |
| 378 | 9,12-Octadecadienoic acid (Z,Z)-                                                                                                           | 49534.832  | 45319.316  | 42667.875   | 31880.13   | 28626.936  | 27422.96   | 26192.505  | 23713.261  | 23881.009  | 41455.737  | 38604.2    | 52261.362   |
| 379 | 1-Isopropenyl-3,3-dimethyl-5-(3-methyl-1-oxo-2-butenyl)cyclopentane                                                                        | 299232.52  | 345689.267 | 273222.386  | 299355.635 | 239526.726 | 264374.268 | 312807.051 | 260906.348 | 248766.136 | 234310.954 | 211211.773 | 222761.3635 |
| 380 | Cyclohexanol, 3,3-dimethyl-                                                                                                                | 310016.616 | 345989.601 | 328003.1085 | 161447.46  | 172711.009 | 183974.558 | 207163.406 | 174249.981 | 192671.335 | 198444.202 | 125049.607 | 161746.9045 |
| 381 | 3-Methoxy-5-methylphenol                                                                                                                   | 233683.507 | 229880.798 | 180814.04   | 157957.911 | 150574.715 | 132397.517 | 131477.135 | 117987.693 | 107835.419 | 109140.151 | 99884.6    | 110602.689  |

|     |                                                                  |            |            |             |            |            |            |            |            |            |            |            |             |
|-----|------------------------------------------------------------------|------------|------------|-------------|------------|------------|------------|------------|------------|------------|------------|------------|-------------|
| 382 | 7-Acetyl-2-hydroxy-2-methyl-5-isopropylbicyclo[4.3.0]nonane      | 43245.597  | 44408.811  | 35802.629   | 36052.254  | 30939.241  | 29506.931  | 25542.871  | 21839.517  | 20562.821  | 20283.045  | 19164.724  | 19723.8845  |
| 383 | Phthalic acid, hept-4-yl isobutyl ester                          | 1277183.69 | 1462787.27 | 1210641.99  | 1835468.01 | 1762668.94 | 1781079.38 | 1887760.69 | 1752414.13 | 1816601.46 | 1730720.1  | 1692128.98 | 1878922.78  |
| 384 | 1-Hexadecyn-3-ol, 3,7,11,15-tetramethyl-                         | 41426.599  | 55660.411  | 48543.505   | 74242.127  | 59375.049  | 70021.651  | 81215.733  | 77704.556  | 79699.128  | 75682.647  | 69028.23   | 94055.997   |
| 385 | Vanillin                                                         | 1938539.02 | 1517019.41 | 1727779.215 | nd          |
| 386 | 3-Methoxy-4-[3-oxo-3-(pyrrolidin-1-yl)propoxy]benzaldehyde       | 74212.431  | 75142.179  | 73277.148   | 79404.699  | 80478.761  | 97518.416  | 80742.933  | 74376.79   | 79285.06   | 78815.064  | 79520.045  | 75208.332   |
| 387 | 9,12,15-Octadecatrienoic acid, methyl ester, (Z,Z,Z)-            | 115171.79  | 100886.396 | 90206.601   | 66933.43   | 50235.671  | 63350.027  | 55036.712  | 57892.438  | 62231.287  | 100651.137 | 84041.67   | 109620.196  |
| 388 | (2R,5R)-2-Methyl-5-(prop-1-en-2-yl)-2-vinyltetrahydrofuran       | 1102350.4  | 939578.824 | 949963.667  | 642316.496 | 845027.018 | 667829.998 | 660009.669 | 604004.622 | 655085.507 | 524384.448 | 475335.458 | 620438.806  |
| 389 | Xanthoxylin                                                      | 108566.002 | 115827.626 | 90754.242   | 89685.454  | 79806.441  | 74483.949  | 68443.104  | 58034.357  | 56253.324  | 56186.037  | 57020.328  | 59886.585   |
| 390 | Phthalic acid, butyl hex-2-yn-4-yl ester                         | 181055.474 | 194307.97  | 169884.974  | 233055.2   | 201588.879 | 216349.635 | 221105.145 | 212093.871 | 210835.531 | 190718.257 | 187545.572 | 253133.32   |
| 391 | Phytol                                                           | 1502648.57 | 1510881.88 | 1520107.88  | 2256180.83 | 2011773.46 | 1767366.09 | 1769813.17 | 1509985.31 | 1452575.22 | 1215194.6  | 1116453.7  | 1488188.82  |
| 392 | 2(4H)-Benzofuranone, 5,6,7,7a-tetrahydro-4,4,7a-trimethyl-, (R)- | 2290678.02 | 2566547.48 | 2428612.75  | 1804091.98 | 1693591.76 | 1682681.84 | 2102426.08 | 1956647.1  | 1956991.82 | 1738281.84 | 1548603.98 | 1643442.91  |
| 393 | 2,6-Octadienoic acid, 8-acetoxy-2,6-dimethyl-, methyl ester      | 80460.405  | 99230.805  | 89845.605   | 83675.453  | 64513.666  | 67399.783  | 88286.954  | 75210.151  | 81113.417  | 70820.831  | 70656.853  | 97734.371   |
| 394 | Caryophyllene oxide                                              | 63631.574  | 55246.263  | 46860.952   | 56903.557  | 51472.602  | 54188.0795 | 50358.936  | 47887.561  | 42019.841  | 43168.845  | 45016.68   | 44092.7625  |
| 395 | 2-Octen-1-ol, (E)-                                               | 438592.548 | 380816.425 | 323040.302  | 290045.2   | 389570.908 | 333739.526 | 400373.333 | 485372.26  | 470761.509 | 459416.138 | 455406.277 | 457411.2075 |
| 396 | (2R,5S)-2-Methyl-5-(prop-1-en-2-yl)-2-vinyltetrahydrofuran       | 330143.065 | 286793.154 | 276588.429  | 187800.018 | 248582.917 | 199718.559 | 205348.897 | 177981.886 | 190613.219 | 156677.259 | 149572.752 | 192475.486  |
| 397 | 2-Butanone, 4-(2,6,6-trimethyl-1-cyclohexen-1-yl)-               | 79186.07   | 92807.547  | 78938.363   | 90300.38   | 69281.715  | 72713.027  | 74802.114  | 67766.314  | 67953.271  | 60361.717  | 67387.102  | 83196.919   |
| 398 | 2'-Hydroxyacetophenone, TMS derivative                           | 114649.095 | 128237.106 | 107842.158  | 133279.159 | 107502.315 | 113201.768 | 120058.747 | 113039.336 | 113843.028 | 105689.414 | 107295.436 | 130207.534  |

|     |                                                                                |            |             |             |             |            |            |            |            |            |            |            |             |
|-----|--------------------------------------------------------------------------------|------------|-------------|-------------|-------------|------------|------------|------------|------------|------------|------------|------------|-------------|
| 399 | Propanamide, N-ethyl-                                                          | nd         | nd          | nd          | nd          | nd         | nd         | 67111.779  | 49590.51   | 58351.1445 | nd         | nd         | nd          |
| 400 | Tetraethylene glycol                                                           | 171724.517 | 169097.2185 | 166469.92   | 144250.529  | 139324.151 | 141787.34  | 158311.053 | 128793.035 | 128638.494 | 109580.466 | 114803.987 | 106484.442  |
| 401 | 7-(2-Hydroxypropan-2-yl)-1,4a-dimethyldecahydronaphthalen-1-ol                 | 51026.058  | 46542.107   | 43348.967   | 44203.187   | 37080.061  | 36763.714  | 35160.857  | 32385.262  | 29943.442  | 28104.799  | 26661.192  | 29450.447   |
| 402 | 5,6-Dimethyl-2-benzimidazolinone                                               | 73749.032  | 78494.44    | 61234.263   | 60943.901   | 53509.663  | 52949.409  | 64829.072  | 56469.074  | 59850.761  | 65975.349  | 66238.358  | 88143.258   |
| 403 | 4-Benzyloxybenzoic acid                                                        | 134130.399 | 145274.252  | 139702.3255 | nd          | nd         | nd         | 111885.134 | 102720.305 | 96192.59   | 88308.95   | 90930.795  | 110758.16   |
| 404 | Naphthalene, 1,2,3,5,6,8a-hexahydro-4,7-dimethyl-1-(1-methylethyl)-, (1S-cis)- | 2136928.95 | 1856142.025 | 1575355.1   | 961906.6195 | 1017311.14 | 906502.099 | 1057723.22 | 867804.148 | 795961.353 | 719893.163 | 596567.306 | 658230.2345 |
| 405 | Benzaldehyde, 3-ethyl-                                                         | 266865.37  | 305243.656  | 286054.513  | 160085.042  | 173004.641 | 179319.218 | 208133.548 | 204464.789 | 195119.254 | 243674.165 | 233735.828 | 286354.123  |
| 406 | Dodeca-1,6-dien-12-ol, 6,10-dimethyl-                                          | 217024.672 | 242677.094  | 229850.883  | 133129.361  | 156568.71  | 115841.432 | 156636.042 | 132596.907 | 151683.804 | 136972.38  | 108299.638 | 165645.122  |
| 407 | Adipic acid, 2-ethylhexyl isohexyl ester                                       | 25210.317  | 25700.41    | 26190.503   | nd          | nd         | nd         | nd         | nd         | nd         | 35036.183  | 28877.745  | 41194.621   |
| 408 | Benzaldehyde, 2-hydroxy-5-methoxy-                                             | 45286.881  | 54183.546   | 42443.93    | 36079.798   | 30648.278  | 41511.318  | 47961.542  | 42969.263  | 37976.984  | 37607.682  | 35037.741  | 47171.59    |
| 409 | 2-Hydroxy-4,4,6-trimethylcyclohexa-2,5-dienone                                 | 97422.765  | 114037.757  | 91121.092   | 115838.249  | 86353.572  | 96560.906  | 97763.365  | 88597.122  | 94744.207  | 87752.061  | 81988.698  | 107955.912  |
| 410 | 2H-1-Benzopyran-2-one, 7-methoxy-                                              | 74387.198  | 81624.649   | 74398.442   | 87536.322   | 68578.487  | 76056.885  | 71462.759  | 72583.864  | 78150.478  | 74698.874  | 71745.988  | 86041.307   |
| 411 | 3,6-Octadien-1-ol, 3,7-dimethyl-, (Z)-                                         | 814772.329 | 708300.1615 | 601827.994  | 413097.373  | 447383.91  | 474295.205 | 479338.126 | 408117.77  | 417861.294 | 497415.15  | 501114.698 | 607096.196  |

\* nd: The compound was not detected.

**Table S2.** List of the nonvolatile compounds in the black tea samples.

| No. | Compounds                       | Peak area  |             |            |             |            |             |             |             |            |            |             |            |
|-----|---------------------------------|------------|-------------|------------|-------------|------------|-------------|-------------|-------------|------------|------------|-------------|------------|
|     |                                 | CRSD-1     | CRSD-2      | CRSD-3     | RLSD-1      | RLSD-2     | RLSD-3      | CLSD-1      | CLSD-2      | CLSD-3     | HASD-1     | HASD-2      | HASD-3     |
| 1   | Uridine 5'-diphosphate          | 7518558    | 7816046     | 7432295    | 7261215     | 7118593    | 6897535     | 10395091    | 9547565     | 9971328    | 9116428    | 9409367     | 9702306    |
| 2   | Epicatechin isomer              | 4275194    | 6979665     | 5627429.5  | 5792711     | 5514084    | 6071338     | 9592271     | 10455508    | 8833676    | 3958839.5  | 3958265     | 3959414    |
| 3   | Gallocatechin                   | 16641814   | 20183373    | 18412593.5 | 14641763    | 13936690.5 | 13231618    | 17714163    | 15787641    | 15981555   | 15469364   | 16149127    | 17834242   |
| 4   | Erythrose                       | 15885699   | 15438558    | 14617360   | 14475986    | 15868932   | 15172459    | 15414367    | 14658556    | 16430409   | 12406152   | 12344092    | 10477863   |
| 5   | Phytosphingosine                | 160826026  | 177671561.5 | 194517097  | 166127767.5 | 175236376  | 157019159   | 164721175   | 151526931   | 190816709  | 185390234  | 180717740.5 | 176045247  |
| 6   | Quercetin triglucoside isomer 1 | 710803     | 670307      | 733843     | 618952      | 520793     | 569872.5    | 582453      | 560924      | 480454     | 695464     | 797971      | 746717.5   |
| 7   | Caffeic acid                    | 1419435.5  | 1289311     | 1549560    | 964539      | 1025854.5  | 1087170     | 1117976     | 1207083     | 1570392    | 1462200    | 1638778     | 1710357    |
| 8   | Methylhistidine                 | 3561141    | 3030171     | 3295656    | 3285148     | 3361973    | 3208323     | 2835134     | 3181981     | 2781757    | 3155564    | 3258931     | 3207247.5  |
| 9   | Raffinose                       | 94811918   | 87540688    | 93211644   | 96121564    | 97550964   | 94188107    | 93261423    | 89685768    | 97774008   | 81563826.5 | 88799959    | 74327694   |
| 10  | Salicylic acid                  | 6276220    | 6311032     | 6214810    | 4912377     | 5251006    | 4952503     | 5567260     | 5304057     | 4791887    | 5911367    | 5878863     | 5846359    |
| 11  | Caffeoylquinic acid 4           | 450888     | 426612      | 475164     | 364875      | 352626     | 358750.5    | 472827      | 514091      | 532102     | 518328     | 579946      | 456710     |
| 12  | Gamma-Aminobutyric acid         | 80710690   | 82381661    | 85214964   | 109245172   | 108315629  | 108614876   | 65849150    | 77531250    | 73988262   | 80737622   | 77144402    | 84330842   |
| 13  | Oxidized glutathione            | 52270871   | 50716283    | 52617431   | 49590786    | 48592686   | 48074032    | 47135044    | 45086539    | 47263817   | 48537759.5 | 46042745    | 51032774   |
| 14  | Val-Pro                         | 21442166.5 | 22975963    | 19908370   | 21042516    | 20575442   | 20617284    | 25490442    | 19596539    | 22107340   | 22422605   | 22908542    | 22665573.5 |
| 15  | Citraconic acid                 | 4698348    | 4364323     | 4899416    | 5492711     | 4928696    | 4810891     | 5196715     | 4484385     | 4860718    | 4944380    | 4985799     | 5027218    |
| 16  | 1-Pyrroline-5-carboxylic acid   | 26108522   | 24321323    | 25214922.5 | 22633620    | 20375978   | 19302345    | 22272621    | 23251048    | 22600903   | 21586907   | 21511405    | 23119659   |
| 17  | L-Fucose/Rhamnulose             | 7872249    | 8300754     | 7818764    | 8150360     | 8050159    | 8143864     | 7369693     | 6877905     | 7230115    | 6316514.5  | 6024974     | 6608055    |
| 18  | Citric acid/Isocitric acid      | 24106535   | 25298873    | 24444388   | 13343822    | 12364027   | 14323617    | 19788466    | 22610991    | 18547656   | 19250031   | 19572846    | 18927216   |
| 19  | Leu-Pro/Ile-Pro                 | 338934     | 318116.5    | 297299     | 297953.5    | 260496     | 335411      | 326265      | 287105      | 306685     | 191583     | 177860      | 205306     |
| 20  | Quinic acid                     | 9938598493 | 9189742029  | 8720250428 | 9786036822  | 9978697707 | 10168548184 | 10906660394 | 10715852824 | 9704900823 | 9413498343 | 9977307444  | 8849689242 |
| 21  | Vanilpyruvic acid               | 17480424   | 18526602    | 19572780   | 20215024    | 21893247.5 | 23571471    | 20970977    | 24923893    | 20999122   | 20187700   | 20918648    | 21649596   |
| 22  | L-Methionine                    | 6052739    | 5945544     | 5892966    | 6690405     | 6098656    | 6394530.5   | 5056898     | 5826778     | 4301816    | 5638404    | 5698450     | 6189327    |

|    |                                                    |            |            |            |            |            |            |            |            |            |            |            |            |
|----|----------------------------------------------------|------------|------------|------------|------------|------------|------------|------------|------------|------------|------------|------------|------------|
| 23 | Ser-Val/Val-Ser                                    | 33283206   | 33737277   | 32716019   | 29488893   | 28721332   | 30536854   | 23915063   | 28844797   | 30944605   | 23843688   | 28163259   | 28508562   |
| 24 | Cyanidin 3-arabinoside                             | 21049923   | 20591872   | 19882764   | 21200699   | 20879915   | 21521483   | 21821439   | 20692376   | 20528999   | 22304171   | 21675887   | 21750192   |
| 25 | L-Proline                                          | 1130249532 | 1201912216 | 1133600062 | 1131961623 | 1096728798 | 1065461019 | 1117132275 | 1092096124 | 1075899440 | 1079668247 | 1072472332 | 1256993014 |
| 26 | Caffeoylquinic acid 1                              | 2939860    | 2962439    | 2893222    | 2991769    | 2872877    | 3263133    | 3576843    | 3779504    | 3253269    | 3958052    | 3303362    | 3544552    |
| 27 | N-Acetylvaline                                     | 239326848  | 217434117  | 239712091  | 219736873  | 213416256  | 228563052  | 214555993  | 218002245  | 221346289  | 230688616  | 219533755  | 258427643  |
| 28 | Assamicain A                                       | 506471339  | 503986004  | 458435721  | 347668999  | 367057015  | 381173029  | 324938765  | 323884329  | 336487715  | 471242393  | 551789190  | 542656523  |
| 29 | N-Acetyl-L-alanine                                 | 19455512   | 16866486   | 18009045   | 16433177   | 16455544   | 18441442   | 15773578   | 19621302   | 18577168   | 17947110   | 20509542   | 17724605   |
| 30 | Adenine                                            | 1154828746 | 1136446353 | 1203007860 | 1122662293 | 1144654573 | 1186817685 | 1090886211 | 1195296253 | 1205741732 | 1185026496 | 1081655545 | 1276461136 |
| 31 | Gallocatechin gallate                              | 5779036    | 6072527    | 6366018    | 16306470   | 16527247.5 | 16748025   | 20727320   | 21500629   | 21113974.5 | 6279033    | 6167020    | 6363932    |
| 32 | Adenosine monophosphate                            | 72663297   | 78488381   | 68922464   | 71707639   | 68649129   | 66781705   | 71670878   | 78444986   | 81440538   | 96629322   | 86766095   | 83631548   |
| 33 | Deoxyribose                                        | 15559168   | 16041832   | 15374101   | 15990925   | 15831114   | 16150736   | 16328466   | 17078973   | 14270802   | 15079617   | 15585677   | 15320263   |
| 34 | L-Carnitine                                        | 23017426   | 24997175   | 22646900   | 22482105   | 21548842   | 24298471   | 22783075   | 21508854   | 22746999   | 24120244   | 22801699   | 26239992   |
| 35 | N-Acetyl-L-aspartic acid                           | 8311810    | 9191136    | 9667073    | 7951102    | 8464867    | 8006070    | 9370522    | 8400036    | 8453010    | 11559463   | 11717852   | 13068607   |
| 36 | Camelliaside C isomer 1                            | 12717583   | 12868561   | 13158582   | 12954127   | 14264530   | 13838444   | 14031213   | 13798804   | 13347089   | 14957126   | 13070713   | 13959083   |
| 37 | Epicatechin-(4beta->8)-<br>epicatechin-3-O-gallate | 6487748    | 6739128    | 7093549    | 5585522    | 5825819    | 5694358    | 5406810    | 5762073    | 5434745    | 7348117    | 6972339    | 6428821    |
| 38 | Guanidinobutanoic acid                             | 23046904   | 22537398   | 23943148   | 23106203   | 21794680   | 22450441.5 | 19811755   | 27059785   | 25956761   | 16875792   | 18170237   | 17523014.5 |
| 39 | Oxoglutaric acid                                   | 15087499   | 15068948   | 16960179   | 14734605   | 16038176   | 16499549   | 15584314   | 15902518   | 14901195   | 15025405   | 15422814   | 17013593   |
| 40 | Succinylacetone                                    | 22892679   | 24288927   | 23636741   | 22257390   | 23775525   | 24214320   | 22093273   | 20901520   | 21533726   | 17203128   | 18844487   | 16598085   |
| 41 | 4-Phenylbutanic acid-O-sulfate                     | 4169905    | 4031336    | 4253404    | 3826568    | 4203059    | 4411949    | 4060493    | 3873747    | 3868254    | 4463835    | 4097526    | 3950882    |
| 42 | 3-Dehydroquinate                                   | 18956450   | 18626770   | 17488063   | 15679195   | 15409529   | 15651509   | 15557443   | 16292657   | 15912423   | 17354334   | 15359173   | 16814121   |
| 43 | Ala-Ala                                            | 151104345  | 160787437  | 144548632  | 150907276  | 145853904  | 143878280  | 136039334  | 130154111  | 132221086  | 130076722  | 134399173  | 145981528  |
| 44 | Indole                                             | 3012701    | 2654580    | 2833640.5  | 2570797    | 2624269    | 2787614    | 2961317    | 3083560    | 3205803    | 2877446    | 2924100    | 2830792    |
| 45 | Dihydroxybenzeneacetic acid                        | 2296045    | 2119905    | 2207975    | 1623570    | 1739252.5  | 1854935    | 1471413    | 1699576    | 1305493    | 1923211    | 2029800    | 1976505.5  |
| 46 | ADP                                                | 25456937   | 25437124   | 21574891   | 28546299   | 24849508   | 26702278   | 31888666   | 26393567   | 26407863   | 26601539   | 23975481   | 24253595   |
| 47 | 1-Methyladenine                                    | 40245123   | 41465411   | 41696546   | 44015911   | 39665181   | 44891440   | 41194557   | 38088084   | 40455631   | 41502261   | 43861601   | 46521199   |

|    |                                            |            |            |            |            |            |            |            |            |            |            |            |            |
|----|--------------------------------------------|------------|------------|------------|------------|------------|------------|------------|------------|------------|------------|------------|------------|
| 48 | Theasinensin A                             | 15089051   | 16505989   | 15797520   | 13392413   | 14779490   | 16166567   | 8556629    | 9364268    | 10171907   | 13433656   | 17066332   | 15249994   |
| 49 | Procyanidin B-isomer2                      | 33333507   | 29698062   | 31309191   | 22827805   | 27361574   | 26087706   | 25405302   | 25569253   | 24191062   | 29745210   | 31847434   | 28522962   |
| 50 | Ala-Thr                                    | 169743168  | 174894457  | 160151924  | 176105721  | 166757574  | 169923003  | 140967778  | 142182817  | 140465627  | 131998772  | 135872362  | 146829801  |
| 51 | O-Phosphoethanolamine                      | 19517154   | 19643643   | 19525323   | 18265586   | 19258463   | 18540227   | 17224281   | 17388667   | 17524689   | 16340654   | 17762989   | 18192687   |
| 52 | Pro-Val                                    | 14958655   | 15667424   | 15506494   | 18097544   | 17964216   | 16924885   | 16535995   | 16454228   | 16353282   | 16428053   | 15646832   | 17472980   |
| 53 | L-Valine                                   | 823215403  | 845212410  | 828427911  | 829454901  | 814968970  | 817172866  | 808904149  | 833975824  | 775719137  | 816067654  | 737290139  | 807379620  |
| 54 | Disaccharide (Maltose, Lactose)            | 29331504   | 29199884   | 29955984   | 27295283   | 28729524   | 25010597   | 26390592   | 25772987   | 24319845   | 25472021   | 23016914   | 23517937   |
| 55 | Pipecolic acid                             | 199275284  | 205593511  | 193191135  | 181516213  | 188135838  | 184748118  | 191051814  | 180468094  | 209082670  | 203315627  | 184222810  | 187085958  |
| 56 | Glucaric acid/Galactaric acid              | 325613862  | 301384519  | 307259019  | 298570008  | 331327854  | 321087439  | 290951215  | 318885734  | 276832621  | 252557330  | 244745130  | 227490497  |
| 57 | Hexose-phosphate                           | 203369775  | 199902538  | 191044899  | 186166316  | 210995647  | 201774339  | 180150494  | 183057292  | 175705202  | 175317648  | 162203695  | 158731475  |
| 58 | Fumaric acid                               | 84138309   | 85387785   | 82002023   | 81729981   | 87604416   | 80226149   | 81685907   | 87287709   | 80790293   | 81608848   | 74731437   | 82284022   |
| 59 | Trimethyl-L-lysine                         | 55774914   | 57330084   | 53846791   | 51344840   | 55563167   | 50422232   | 50863788   | 56474933   | 55848014   | 51252609   | 55212701   | 56762972   |
| 60 | Epicatechin 3-O-(3-O-methylgallate) isomer | 648515     | 591987     | 662211     | 566878     | 622945     | 598628     | 645812     | 629663     | 637382     | 658922     | 721212     | 663061     |
| 61 | Glutaric acid                              | 3941610    | 4007290    | 3875930    | 5432754    | 3928016    | 2423278    | 3796100    | 2529696    | 3220336    | 4591523    | 3936796    | 5246250    |
| 62 | Gluconic acid                              | 813449258  | 789999732  | 780729462  | 739766303  | 877743033  | 829000987  | 701961296  | 728962471  | 696638880  | 619717730  | 593401827  | 562652273  |
| 63 | Theasinensin F                             | 11649002   | 10842264   | 9942343    | 10603217   | 11454592   | 11736569   | 10440471   | 11538065   | 11405660   | 12527032   | 11932502   | 11376496   |
| 64 | N-Acetylglutamic acid                      | 38832337   | 39214921   | 40634195   | 36786764   | 39404594   | 37601411   | 38121223   | 39737896   | 38438458   | 34860996   | 38143897   | 36175749   |
| 65 | Epicatechin 3-O-(3-O-methylgallate)        | 15495146   | 14456242   | 15059509   | 12907369   | 14462373   | 13835640   | 14923132   | 14059514   | 12802365   | 16327275   | 16630240   | 15243727   |
| 66 | L-Histidine                                | 40158906   | 45674330   | 40430141   | 38575322   | 39516761   | 42059164   | 35889915   | 34381146   | 36448474   | 39920473   | 38132641   | 36476883   |
| 67 | Nicotinic acid                             | 119457727  | 109515324  | 127814375  | 115966910  | 122156542  | 129177414  | 107032745  | 105203275  | 111624452  | 108747146  | 107735966  | 116736944  |
| 68 | Pro-Ser                                    | 102519491  | 107603629  | 105626773  | 107163786  | 102410918  | 108532382  | 108151287  | 105139210  | 102585620  | 102942282  | 95461063   | 95603784   |
| 69 | L-Glutamic acid                            | 1796488670 | 1883263771 | 1753090876 | 1848307437 | 1805652901 | 1773426117 | 1775069747 | 1715159433 | 1663677514 | 1626639550 | 1660170453 | 1762979769 |
| 70 | Pyrocatechuic acid                         | 60469472   | 63553301   | 59544327   | 59472645   | 63356780   | 61763522   | 62100412   | 61953300   | 59835681   | 63480520   | 61251273   | 66570137   |
| 71 | Homo-L-arginine                            | 22540074   | 22478314   | 22586552   | 20821918   | 21930595   | 21418540   | 21039280   | 22125694   | 22894682   | 21492513   | 23366132   | 22353970   |



|    |                                 |             |             |             |             |             |             |             |             |             |             |             |             |
|----|---------------------------------|-------------|-------------|-------------|-------------|-------------|-------------|-------------|-------------|-------------|-------------|-------------|-------------|
| 72 | Nicotinate D-ribonucleoside     | 174240144   | 168468973   | 179675265   | 160894552   | 156074095   | 165396841   | 144847943   | 157871866   | 166332937   | 168340761   | 160333725   | 173628493   |
| 73 | L-Theanine                      | 26583916321 | 27640648482 | 26156518947 | 26867131480 | 26738241877 | 26933260716 | 25378248601 | 26556950410 | 24221818792 | 25264533447 | 23407174599 | 24761981605 |
| 74 | Glyceric acid                   | 14387537    | 13516423    | 15373219    | 16374728    | 16188479    | 18256115    | 18074153    | 18995123    | 15526547    | 14904546    | 14079258    | 15179447    |
| 75 | Phospho-glyceric acid           | 59659386    | 55529328    | 53211227    | 51005194    | 50349176    | 50662104    | 58464780    | 57901512    | 49933400    | 61201817    | 58123064    | 62709201    |
| 76 | Ile-Ser                         | 28534096    | 30632099    | 27427382    | 28716434    | 31587887    | 32122381    | 29588834    | 28082180    | 29354692    | 28948275    | 26953545    | 28545176    |
| 77 | Shikimic acid                   | 132812016   | 137010763   | 133068418   | 148571152   | 139841234   | 137322818   | 155766582   | 158907166   | 153876571   | 142591827   | 141924512   | 133313417   |
| 78 | Isorhamnetin                    | 3136100     | 2934115     | 2744897     | 2850404     | 2976785     | 2890359     | 3293456     | 3115441     | 2885684     | 3623984     | 3419954     | 3390801     |
| 79 | Malvidin 3-glucoside            | 5174816     | 4994584     | 4968003     | 4898223     | 5687872     | 5314913     | 5501745     | 5193798     | 5393571     | 5277861     | 5516626     | 5136308     |
| 80 | Glu-Ala                         | 41614547    | 40851362    | 40855028    | 40253709    | 40390934    | 40193798    | 37626663    | 39144647    | 38798402    | 36982689    | 34590323    | 36677213    |
| 81 | 2-Methylcitric acid             | 43804906    | 45934671    | 42476821    | 41054447    | 42368260    | 45911758    | 47801889    | 50086580    | 48035726    | 48616181    | 52198360    | 50302201    |
| 82 | Ribonic acid                    | 504898276   | 495496078   | 510859969   | 470300419   | 548264308   | 494860705   | 456107103   | 492553038   | 459365638   | 399664586   | 407223226   | 380104225   |
| 83 | Gluconolactone                  | 17924557    | 18080126    | 17332681    | 15533073    | 18122300    | 16331556    | 16329685    | 16862126    | 14982668    | 17553282    | 16780497    | 17994756    |
| 84 | Sedoheptulose-phosphate         | 1203483056  | 1092755252  | 1142316605  | 1111551684  | 1136950249  | 1144293545  | 1355972316  | 1332984493  | 1139716416  | 1171572391  | 1139072727  | 1092857463  |
| 85 | 2-Hydroxyglutarate              | 42082715    | 43051942    | 42113024    | 39313296    | 40700737    | 40403611    | 39799693    | 39578730    | 40588748    | 42369840    | 40724898    | 39561678    |
| 86 | Quercetin triglucoside isomer 2 | 3416094     | 3371202     | 3536422     | 3385072     | 3305433     | 3100666     | 3494387     | 3142510     | 3204234     | 3690744     | 3506507     | 3461489     |
| 87 | Myricetin                       | 22106655    | 21036911    | 18968009    | 20868669    | 20937684    | 18933380    | 24654966    | 23640834    | 22712401    | 20728292    | 20481558    | 21828258    |
| 88 | N-Acetylproline                 | 9954242436  | 10509316949 | 9704077442  | 10034622369 | 10143501619 | 10436012867 | 10232211440 | 9476167242  | 9653046666  | 9757179923  | 9498806395  | 9117027140  |
| 89 | Thr-Pro/Pro-Thr                 | 40942919    | 41048865    | 43705739    | 33594008    | 34117883    | 35811260    | 30677935    | 35373237    | 35217900    | 32378571    | 32018399    | 34045217    |
| 90 | L-Threonine                     | 184358067   | 193111317   | 182154361   | 185449930   | 182445052   | 179087127   | 172838124   | 176675682   | 168991612   | 175991811   | 182387440   | 187928776   |
| 91 | Pinitol                         | 66940673    | 68693510    | 71368663    | 65592999    | 69500592    | 66966622    | 57604681    | 62097264    | 60748254    | 49768244    | 49772007    | 52572118    |
| 92 | Methylsuccinic acid             | 9283715     | 9528134     | 9222388     | 8249134     | 9233529     | 9012755     | 8839685     | 8895293     | 8946805     | 8885028     | 9344117     | 9428537     |
| 93 | Linalool primeveroside          | 1299200     | 1351309     | 1285102     | 1311360     | 1472034     | 1430997     | 1600460     | 1559890     | 1541455     | 1302675     | 1239955     | 1229910     |
| 94 | Procyanidin C1                  | 10380164    | 10343090    | 9316564     | 8445022     | 8759034     | 9140740     | 8521934     | 8367555     | 8738061     | 10054740    | 9514435     | 9555066     |
| 95 | Leu-Ser                         | 24784620    | 26040527    | 22863728    | 27641030    | 27840773    | 27690278    | 24945618    | 26228949    | 24270465    | 21696729    | 22318206    | 23078485    |
| 96 | Proline betaine                 | 147848173   | 147627415   | 147984294   | 139650137   | 138412402   | 135563297   | 125433939   | 152402791   | 147214316   | 154915956   | 148156150   | 157299246   |
| 97 | L-Phenylalanine                 | 3542808112  | 3760751131  | 3534046382  | 3471740811  | 3411881360  | 3482396109  | 3344036519  | 3407437923  | 3429779823  | 3175919941  | 3216794331  | 3362732616  |

|     |                                              |            |            |            |            |            |            |            |            |            |            |            |            |
|-----|----------------------------------------------|------------|------------|------------|------------|------------|------------|------------|------------|------------|------------|------------|------------|
| 98  | Choline                                      | 1594192741 | 1703584662 | 1647161769 | 1668884601 | 1703875977 | 1691461409 | 1785737391 | 1746225008 | 1716579209 | 1770291499 | 1776956134 | 1683231083 |
| 99  | Naringin                                     | 13230002   | 13196513   | 12869711   | 12913215   | 13435818   | 13859848   | 13978848   | 13711298   | 13699518   | 14148668   | 13375778   | 13522985   |
| 100 | cis-4-Decenedioic acid                       | 5208670    | 5134303    | 5473124    | 5293789    | 5563023    | 5894775    | 5003168    | 4863849    | 5110954    | 5130289    | 5309673    | 5446438    |
| 101 | 2-Hydroxyphenethylamine                      | 1995433169 | 1974015361 | 1933331108 | 1915693624 | 1859762705 | 1881515960 | 1821436677 | 1849790897 | 1916562756 | 1754154571 | 1798786123 | 1861470847 |
| 102 | Procyanidin C1 isomer                        | 13238535   | 12508650   | 12113866   | 10172539   | 10493389   | 10656037   | 10867567   | 10811405   | 10581132   | 11235314   | 11890010   | 11476226   |
| 103 | Uridine diphosphate glucose                  | 86492649   | 76003622   | 77336283   | 73125161   | 77836247   | 81965082   | 68164334   | 70028036   | 72155198   | 67298171   | 64223539   | 67681544   |
| 104 | Quercetin-3-O-galactoside                    | 39454546   | 38408435   | 39286825   | 39423704   | 40634802   | 40653523   | 41811353   | 39202067   | 39150429   | 42395335   | 40947643   | 40172336   |
| 105 | Nicotinamide riboside                        | 22773472   | 22972437   | 21869157   | 28196663   | 26729316   | 25121335   | 14042172   | 14087316   | 13666000   | 10871159   | 11089295   | 11474246   |
| 106 | Hydroxypyruvic acid                          | 8195679    | 8570340    | 8329231    | 7998862    | 9002794    | 7977039    | 8203546    | 8700386    | 7729800    | 7812213    | 7750907    | 8148672    |
| 107 | L-Arginine                                   | 487936290  | 522155164  | 500681567  | 482507680  | 497505084  | 497305118  | 472118310  | 470633713  | 495378362  | 468089193  | 469814955  | 447760083  |
| 108 | Cyanidin 3-(6''-malonylglucoside)            | 7202820    | 7457500    | 7544532    | 7440312    | 8229703    | 8288454    | 8184656    | 8112804    | 8455935    | 7561501    | 7945830    | 7878947    |
| 109 | Peonidin-3-glucoside                         | 163576     | 148354     | 133132     | 67498      | 90219      | 78858.5    | 100726     | 113540     | 105267     | 146401     | 137304     | 141852.5   |
| 110 | Glycerophosphocholine                        | 164881639  | 160600366  | 153893905  | 151107570  | 138160266  | 142076051  | 149800730  | 147166016  | 146226550  | 131819321  | 138903821  | 135158722  |
| 111 | Uridine 5'-monophosphate                     | 105098101  | 101861177  | 100774876  | 104876131  | 106707565  | 104643883  | 126496102  | 124449863  | 126545398  | 123837103  | 117709541  | 119583072  |
| 112 | Glp-Gln                                      | 162534770  | 157994783  | 154126700  | 148426350  | 133973779  | 137828261  | 146533134  | 145007277  | 147207570  | 127952866  | 133891933  | 133898792  |
| 113 | N-Acetyl-D-glucosamine                       | 33199808   | 35371130   | 33033753   | 34412980   | 33126155   | 32720722   | 35831370   | 36820609   | 36663628   | 37046791   | 35707968   | 37550697   |
| 114 | N-Acetylthreonine                            | 75866196   | 80132402   | 77325246   | 73730765   | 69921881   | 69788417   | 89401637   | 88084673   | 84718714   | 127261806  | 122170013  | 128038951  |
| 115 | Succinyladenosine                            | 6380484    | 6708051    | 6609995    | 6749802    | 6519999    | 7035476    | 6780305    | 7119923    | 7164178    | 7043274    | 6756077    | 7074476    |
| 116 | Procyanidin B2                               | 9230174    | 8703672    | 8801301    | 6856282    | 7031887    | 7112704    | 7538019    | 7441175    | 7640264    | 8581851    | 9021763    | 8818711    |
| 117 | Ellagic acid                                 | 1256317827 | 1225652371 | 1155055198 | 1298502941 | 1323082419 | 1307627702 | 1533465734 | 1507982771 | 1557564806 | 1403332371 | 1378225068 | 1446865677 |
| 118 | Luteolin 3'-acetylglucuronide                | 10710728   | 11323620   | 11548894   | 10015836   | 9691004    | 10309457   | 8737013    | 8771471    | 8962082    | 12281194   | 11700461   | 12088411   |
| 119 | Kaempferol-3-O-galactoside                   | 77583419   | 77838101   | 74238227   | 79444338   | 78983467   | 82552971   | 84932865   | 78391379   | 81169272   | 79558253   | 79520281   | 82939710   |
| 120 | Catechin-(4alpha->8)-epicatechin-3-O-gallate | 23249655   | 21350826   | 21484110   | 18279714   | 18232053   | 17845668   | 21213583   | 23818035   | 23062210   | 20080954   | 21002397   | 20225702   |
|     | Kaempferol 3-galactosylrutinoside            | 318155600  | 316105884  | 307775160  | 327464892  | 324464161  | 330716360  | 347301561  | 321215274  | 329796049  | 319001924  | 314843001  | 329840229  |

|     |                                              |            |            |            |            |            |            |            |            |            |            |            |            |
|-----|----------------------------------------------|------------|------------|------------|------------|------------|------------|------------|------------|------------|------------|------------|------------|
| 122 | Epigallocatechin 3-O-(3-O-methylgallate)     | 13488241   | 13476563   | 12911376   | 10012425   | 10535728   | 10855174   | 10266794   | 9487304    | 8514491    | 13327995   | 13821632   | 13945055   |
| 123 | Syringic acid                                | 1142280    | 1045970    | 1094125    | 989259     | 1074616    | 1159973    | 1074604    | 1038340    | 1167227    | 1034418    | 1021518    | 1047318    |
| 124 | L-Asparagine                                 | 325225410  | 351401156  | 323943380  | 335126504  | 330046474  | 323330504  | 326288228  | 325225756  | 312081500  | 313857169  | 309169982  | 323818152  |
| 125 | Catechin                                     | 56219993   | 55118991   | 54410693   | 49590683   | 47570266   | 48436484   | 55230735   | 54598716   | 52381127   | 55706812   | 58342358   | 56545360   |
| 126 | Quercetin 3-(3R-glucosylrutinoside) isomer 1 | 169212442  | 165235109  | 164303401  | 170577358  | 173873096  | 177934475  | 179082643  | 168042310  | 170845738  | 182523118  | 179113763  | 174190453  |
| 127 | Camelliaside A isomer 2                      | 2343098811 | 2338444148 | 2276421578 | 2278811890 | 2464256861 | 2346447269 | 2475108762 | 2427174556 | 2419070673 | 2436658676 | 2329710935 | 2357147366 |
| 128 | Catechin 3-O-gallate                         | 3130967306 | 3125839821 | 2976210830 | 2855196633 | 2884002509 | 2943011262 | 3079659226 | 3059900111 | 3074608761 | 3267600168 | 3162080216 | 3125677007 |
| 129 | 3-Methylxanthine                             | 74857709   | 72970655   | 69637511   | 74778294   | 73541042   | 75638533   | 82327870   | 86134769   | 86597167   | 78890904   | 81015267   | 82619113   |
| 130 | Quercetin                                    | 157688265  | 152074658  | 145848377  | 144206644  | 147320938  | 153348260  | 149070492  | 143381806  | 140051610  | 153326246  | 160544537  | 156579282  |
| 131 | 1-O-Galloylglucose                           | 501290441  | 497364967  | 481256606  | 534408475  | 464546723  | 461051642  | 567547453  | 557887785  | 549959175  | 506294851  | 498373813  | 521036581  |
| 132 | Caffeoylquinic acid 3                        | 18661448   | 18809000   | 17509464   | 18468948   | 18505241   | 17674371   | 19605694   | 20544604   | 20873429   | 19061704   | 18239113   | 18602821   |
| 133 | Quercetin isomer                             | 107197402  | 105271586  | 97695865   | 124167077  | 126926284  | 132956619  | 126650923  | 120476215  | 121156795  | 132832126  | 138366165  | 137458992  |
| 134 | Theasinensin B                               | 13238226   | 13186435   | 12370358   | 12605633   | 11372032   | 11919109   | 11811901   | 12867138   | 12852112   | 13435488   | 14018222   | 13817726   |
| 135 | Azelaic acid                                 | 3750787    | 3218230    | 3617283    | 3427684    | 3286928    | 3568440    | 3969405    | 3191197    | 2823675    | 3293724    | 3112639    | 3203181.5  |
| 136 | Xanthurenic acid                             | 2945989    | 2750105    | 2739445    | 2765459    | 2765926    | 2932589    | 2940753    | 2899795    | 2890399    | 2988451    | 2894192    | 2879271    |
| 137 | Quercetin-arabinoside                        | 5410821    | 5147596    | 5040687    | 5353056    | 5300020    | 5608641    | 5585754    | 5231346    | 5252578    | 6002191    | 5819178    | 5780772    |
| 138 | L-Aspartic acid                              | 375484019  | 389266474  | 368449114  | 376428927  | 367384351  | 357509738  | 370185828  | 371075406  | 361700534  | 371106733  | 365142480  | 380011290  |
| 139 | Kaempferol 3-O-rhamnoside-7-O-glucoside      | 125036054  | 123138025  | 122779931  | 132081229  | 137880585  | 139588366  | 139564313  | 138189911  | 133720250  | 143986587  | 138468625  | 140395191  |
| 140 | Ile-Thr                                      | 54434854   | 57633237   | 56902448   | 53956835   | 51122440   | 59679927   | 54773532   | 55781426   | 51669363   | 54908354   | 53792120   | 52778318   |
| 141 | Camelliaside C isomer 2                      | 21716826   | 22131080   | 21127744   | 22231335   | 21750881   | 23144062   | 22653360   | 22177788   | 22382745   | 22627594   | 22071676   | 22941154   |
| 142 | Strictinin (Corilagin)                       | 677022452  | 672345239  | 632522749  | 696939351  | 706134990  | 698015938  | 853003826  | 797776009  | 816846749  | 733510229  | 707053108  | 728449783  |
| 143 | L-Tyrosine                                   | 551004969  | 553860008  | 515257583  | 561571106  | 534562962  | 514861805  | 498085569  | 526027170  | 521835650  | 508773804  | 526527495  | 525466277  |
| 144 | Linalool oxide primeveroside                 | 24705527   | 24355459   | 22025827   | 21415796   | 22688847   | 21756948   | 25538715   | 22989161   | 22890687   | 21320134   | 21113768   | 20561770   |

|     |                                            |             |             |             |             |             |             |             |             |             |             |             |             |
|-----|--------------------------------------------|-------------|-------------|-------------|-------------|-------------|-------------|-------------|-------------|-------------|-------------|-------------|-------------|
| 145 | Pyroglutamic acid                          | 304164072   | 305235807   | 288476847   | 265955293   | 280309598   | 270308004   | 336033494   | 346889629   | 333520223   | 520053822   | 534982390   | 538813884   |
| 146 | L-Leucine/L-Isoleucine                     | 2914256305  | 2968140284  | 2828321097  | 2778918242  | 2820033609  | 2825826982  | 2746439167  | 2913952913  | 2735856287  | 2776464779  | 2679133043  | 2753782199  |
| 147 | Val-Glu                                    | 592109466   | 569176124   | 517095241   | 512925946   | 504764146   | 513170633   | 464098441   | 491559837   | 465187554   | 500963813   | 519351767   | 506311053   |
| 148 | Acetoacetic acid                           | 17915449    | 17883426    | 17899437.5  | 17842492    | 17835415    | 17869440    | 14063340    | 16262385    | 16070024    | 17166014    | 14235275    | 15383028    |
| 149 | Quercetin-4'-glucuronide                   | 26638470    | 26163427    | 26189468    | 23037252    | 24746755    | 24389421    | 30731095    | 29932413    | 31066321    | 27319776    | 26529674    | 27454772    |
| 150 | Kaempferol-3-O-rutinoside                  | 423871239   | 422160488   | 398035503   | 423779354   | 432355302   | 443441790   | 452351014   | 428990951   | 439839044   | 461825750   | 445875473   | 457415019   |
| 151 | Gallic acid                                | 5450805194  | 5491996937  | 5279423122  | 5503896728  | 5920632245  | 5691410015  | 6257523595  | 6300399939  | 6352458574  | 6245764990  | 6026742813  | 6118613523  |
| 152 | N-acetyltryptophan                         | 64139700    | 62361762    | 61381822    | 61764226    | 61331156    | 62729169    | 65090071    | 65435653    | 65329279    | 63251417    | 64784465    | 62589917    |
| 153 | Coumaric acid                              | 58156467    | 57491067    | 55996735    | 52827243    | 55894275    | 56710053    | 56639027    | 56810849    | 56388910    | 62291882    | 60741684    | 60271816    |
| 154 | L-Lysine                                   | 164352385   | 175801629   | 164536546   | 157196558   | 166969202   | 162355880   | 152916478   | 143017275   | 160077882   | 142622124   | 143563171   | 138945406   |
| 155 | Phosphorylcholine                          | 1073817139  | 1105653254  | 1014961916  | 1012246097  | 970199573   | 979705017   | 1005897325  | 993918355   | 964940998   | 973159167   | 1006979950  | 987417945   |
| 156 | Ribose phosphate                           | 21447400    | 20650521    | 22621830    | 21768248    | 21515865    | 22020631    | 20038348    | 18825978    | 20067781    | 20595545    | 17179505    | 17995912    |
| 157 | Myricetin 3-glucoside                      | 81515050    | 77875581    | 78678679    | 72275305    | 75333869    | 76423086    | 77306337    | 80400899    | 73331574    | 80307508    | 82902294    | 80723816    |
| 158 | 2'-O-Methyladenosine                       | 16590866    | 17339130    | 15628696    | 18559615    | 18075228    | 18008513    | 17518747    | 18971946    | 18603755    | 17737263    | 17198337    | 17685256    |
| 159 | Hexose(glucose/galactose/fructose          | 471500308   | 467578419   | 468603015   | 453733337   | 488691639   | 475158191   | 412863025   | 452176758   | 441433003   | 368333176   | 364925546   | 377007848   |
| 160 | Maltol                                     | 19554218    | 22826969    | 21190593.5  | 20313977    | 22037011    | 20279577    | 20000775    | 18580601    | 15160205    | 17491049.5  | 17052953    | 17929146    |
| 161 | Camelliaside A isomer 1                    | 647827461   | 641081365   | 624994248   | 658214040   | 669109051   | 678648452   | 694810707   | 673381013   | 663741753   | 690357842   | 669673946   | 673268792   |
| 162 | Ala-Ile                                    | 32000236    | 32849454    | 30217743    | 31663829    | 30558935    | 31984055    | 29056067    | 31741853    | 30579244    | 28436153    | 28446898    | 29247675    |
| 163 | Glucosylvitexin isomer 2                   | 100524871   | 96649317    | 94907855    | 100087845   | 105935017   | 105821230   | 123319635   | 125851773   | 117778824   | 125300263   | 126449863   | 129275582   |
| 164 | Theogallin                                 | 2550256547  | 2541485607  | 2513714884  | 2493481473  | 2506789040  | 2555391054  | 2701084796  | 2736301537  | 2685655140  | 2534559883  | 2549209374  | 2609872041  |
| 165 | Quercetin 3-glucosyl-rhamnosyl-galactoside | 87026927    | 83936492    | 84538324    | 87863461    | 90703618    | 90494915    | 92111547    | 88982599    | 88013632    | 92927626    | 91458489    | 90144630    |
| 166 | Quercetin 3-O-glucosylrutinoside           | 210222083   | 211605029   | 211995003   | 207276599   | 223553676   | 229316529   | 228537190   | 217460710   | 215199701   | 224334658   | 223530225   | 218161414   |
| 167 | Theaflavin                                 | 304624389   | 299193680   | 289791865   | 269616666   | 274143208   | 287875700   | 274437777   | 272956667   | 265985388   | 277110853   | 282816892   | 285191475   |
| 168 | Caffeine                                   | 91215952647 | 91989825368 | 90563865042 | 90983071427 | 92604703452 | 92223191527 | 97036850854 | 96490335701 | 95878389814 | 95154415286 | 94021674806 | 92417138192 |
| 169 | Isoquercitrin                              | 270297557   | 260887462   | 258340925   | 262173272   | 260607964   | 274861207   | 279264598   | 265682528   | 270382935   | 285276386   | 277964060   | 284843625   |

|     |                                                       |           |           |           |           |           |           |           |           |           |           |           |           |
|-----|-------------------------------------------------------|-----------|-----------|-----------|-----------|-----------|-----------|-----------|-----------|-----------|-----------|-----------|-----------|
| 170 | Deoxyinosine                                          | 20696126  | 20100370  | 18984461  | 20355253  | 20114166  | 20325652  | 21576109  | 20615575  | 21053390  | 19775617  | 19317709  | 19267194  |
| 171 | Quercetin 3-(3R-glucosylrutinoside) isomer 2          | 489191173 | 472394278 | 473374110 | 479577193 | 502969472 | 503827853 | 517356099 | 492151666 | 478056440 | 504217596 | 490643982 | 497145610 |
|     | Guanosine                                             | 172937386 | 176315243 | 169784534 | 202267992 | 205275412 | 197441540 | 193710087 | 201429798 | 193815426 | 178308469 | 174446044 | 178882502 |
| 173 | Pro-Thr                                               | 59921965  | 60125720  | 59044028  | 59141659  | 59462743  | 60109524  | 63216288  | 63426939  | 61896997  | 65103509  | 63943955  | 63408091  |
| 174 | Quercetin 3,4'-diglucoside                            | 11955156  | 11508264  | 10658924  | 11332043  | 11176215  | 11944304  | 11669480  | 12172580  | 11377312  | 11646862  | 11904618  | 11618137  |
| 175 | Digalloyl-beta-D-glucose 1                            | 128166916 | 124375004 | 121937777 | 134600885 | 136188891 | 139213698 | 143295237 | 141229822 | 146411584 | 126556535 | 128992039 | 129803771 |
| 176 | D-Ribose                                              | 63326187  | 66691099  | 65076135  | 63388906  | 64907164  | 66885206  | 57634412  | 62033775  | 57936575  | 50328205  | 49022602  | 49635538  |
| 177 | Apigenin 8-C-glucoside                                | 48260639  | 45886825  | 43823040  | 45598100  | 46946473  | 47134133  | 53248585  | 53151396  | 51159975  | 58723834  | 59107734  | 60206737  |
| 178 | Phenylethyl primeveroside isomer                      | 180435174 | 175654870 | 161737977 | 175499903 | 174374107 | 171025494 | 180050181 | 176922658 | 181602866 | 178854712 | 175778683 | 180281741 |
|     | Abscisic acid                                         | 68250669  | 68233194  | 67585291  | 66680303  | 68476819  | 69063017  | 67811607  | 67722475  | 67884195  | 67738806  | 69466597  | 68820701  |
| 180 | Coumaroyl quinic acid 4                               | 566266897 | 563028912 | 549183008 | 537392871 | 546002989 | 558569929 | 552540180 | 548974759 | 551001762 | 565348118 | 579333613 | 575780048 |
| 181 | Coumaroyl quinic acid 3                               | 566546943 | 563307806 | 549441629 | 537658637 | 546273014 | 558846169 | 552820614 | 549246370 | 551272302 | 565627789 | 579620121 | 576064799 |
| 182 | Trigalloylglucose                                     | 367868634 | 356477134 | 365451703 | 393608963 | 396866766 | 406945477 | 410760461 | 399171719 | 446289572 | 416486595 | 406470093 | 409263041 |
| 183 | Threonic acid                                         | 101578372 | 102048914 | 101654182 | 105912571 | 104263501 | 101491668 | 109944754 | 115948662 | 101201091 | 105022219 | 103138205 | 105649337 |
| 184 | Epicatechin-(4beta->8)-epicatechin-3-O-gallate isomer | 35439099  | 34955985  | 34705505  | 32851972  | 30648083  | 31717358  | 33974029  | 37242506  | 37847830  | 34570351  | 34002718  | 33737440  |
|     | Guanine                                               | 308409093 | 304996862 | 296576138 | 349835979 | 353272193 | 347199934 | 341785899 | 338294923 | 345687765 | 321303410 | 313493040 | 317679505 |
| 186 | Epigallocatechin                                      | 498977701 | 474170183 | 453713299 | 354185994 | 357698990 | 382598990 | 333874850 | 330498091 | 320816093 | 448941783 | 459470353 | 451129033 |
| 187 | L-Serine                                              | 86068010  | 87677130  | 85615019  | 83262784  | 88097799  | 84881297  | 80846958  | 83733915  | 78468399  | 82826168  | 84346334  | 82432003  |
| 188 | Glucosylvitexin isomer 1                              | 136027639 | 132580889 | 130500352 | 123251804 | 126915127 | 127373494 | 118470012 | 113423825 | 111783425 | 126265973 | 123258393 | 124581290 |
| 189 | Epiafzelechin                                         | 143649566 | 143564353 | 134711932 | 134845700 | 133632142 | 139021493 | 130135545 | 127079299 | 128613704 | 142784228 | 144293230 | 146266066 |
| 190 | Digalloyl-beta-D-glucose 2                            | 183590483 | 162886095 | 169632340 | 190061725 | 190022850 | 197328593 | 196454170 | 189118268 | 197457345 | 180758624 | 185009331 | 183749065 |
| 191 | Glucosylvitexin                                       | 43030393  | 40668036  | 38956185  | 42107279  | 43757346  | 44147919  | 50475545  | 49110835  | 49004964  | 57416229  | 56079925  | 56926330  |
| 192 | Pyridoxine                                            | 56196369  | 57177089  | 51920288  | 54568826  | 55195824  | 56212436  | 60125205  | 55777352  | 55974207  | 63342386  | 62839938  | 61877398  |

|     |                                 |            |           |           |           |            |            |            |            |            |           |            |            |
|-----|---------------------------------|------------|-----------|-----------|-----------|------------|------------|------------|------------|------------|-----------|------------|------------|
| 193 | Glu-Hyp/Hyp-Glu                 | 95380067   | 93055467  | 90069146  | 90467641  | 94728859   | 96487255   | 98672104   | 98707866   | 97076050   | 93803613  | 94963968   | 92737041   |
| 194 | Glycerol 3-phosphate            | 98649689   | 100143079 | 99991886  | 75703500  | 84287863   | 76087147   | 77195275   | 77531998   | 71185865   | 95052373  | 92929693   | 94533165   |
| 195 | Isoquercetin isomer 2           | 159059209  | 158573018 | 154203493 | 162704622 | 164189923  | 167541736  | 167251420  | 162088868  | 163634736  | 171166809 | 167701077  | 167942215  |
| 196 | NAD+                            | 26350717   | 26853594  | 26090331  | 26175684  | 27106632   | 27120662   | 22437883   | 21841640   | 20762333   | 18369307  | 17981908   | 18305454   |
| 197 | Isovitexin                      | 68887629   | 66755861  | 62343994  | 65998055  | 64947600   | 69538941   | 81529480   | 79836427   | 75860072   | 86113249  | 86358309   | 87928668   |
| 198 | Ascorbic acid                   | 19563651   | 20478825  | 20937887  | 16480762  | 19143481   | 18133429   | 19713763   | 20504576   | 19981197   | 22857499  | 22822313   | 23288632   |
| 199 | cis-Aconitic acid               | 265964264  | 257253543 | 268155726 | 238997630 | 256850542  | 249797292  | 235680485  | 246645465  | 242248471  | 217839629 | 221869078  | 222368487  |
| 200 | L-Glutamine                     | 852775367  | 924127099 | 861863185 | 859511093 | 862531256  | 880465568  | 742840738  | 755052598  | 736190515  | 663410461 | 659011768  | 673260022  |
| 201 | Kaempferol-3-O-glucoside isomer | 315030297  | 310946063 | 296158571 | 304400482 | 313212413  | 316499244  | 338931181  | 320436409  | 316485131  | 331796558 | 328204653  | 335475819  |
| 202 | Benzaldehyde                    | 14806488   | 14578910  | 12928765  | 15190204  | 13978992   | 13701408   | 14363004   | 14226538   | 14102078   | 14152383  | 13853761   | 13970453   |
| 203 | Succinic acid                   | 128755390  | 131334090 | 131632920 | 126273213 | 129965147  | 134632162  | 134400593  | 137888580  | 132759493  | 132550351 | 131743364  | 129915261  |
| 204 | Acetamidobutanoic acid          | 34051422   | 37268504  | 39131216  | 32800120  | 31246457   | 31458613   | 37446062   | 39169358   | 32625787   | 53358472  | 52341380   | 53101815   |
| 205 | Hydroxybenzoic acid 2           | 90746011   | 87158981  | 92266640  | 87192263  | 90524888   | 93071671   | 93613665   | 90948146   | 90260356   | 92595800  | 90891440   | 91370038   |
| 206 | 2-Isopropylmalic acid           | 168830581  | 172639645 | 170978658 | 158848505 | 173747918  | 177421641  | 170855669  | 174889554  | 169464811  | 172958384 | 176261315  | 174535913  |
| 207 | 3-O-Caffeoylquinic acid         | 17709402   | 17723365  | 16424431  | 16073014  | 17470211   | 17222471   | 19113702   | 18500977   | 19224172   | 18950014  | 18731696   | 18603402   |
| 208 | Furoic acid                     | 199794886  | 195250583 | 192310349 | 190009058 | 205045963  | 183118717  | 182920560  | 205765385  | 196158518  | 196400739 | 194158934  | 197686884  |
| 209 | Hydroxybenzaldehyde             | 228823409  | 224107976 | 216208414 | 218493469 | 212187811  | 205512158  | 223003889  | 218048459  | 221439107  | 230220042 | 227378669  | 231360688  |
| 210 | Kaempferol 3-glucosylrutinoside | 1013307502 | 991228063 | 966293628 | 994715992 | 1018032782 | 1014188178 | 1051924318 | 1010514580 | 1007880089 | 998452240 | 1002910736 | 1015451506 |
| 211 | Myricetin 3-galactoside         | 66712576   | 64979240  | 63586957  | 61559606  | 62454295   | 64938275   | 66076788   | 66363866   | 63160453   | 66853497  | 67928785   | 66974813   |
| 212 | Theaflavin 3'-O-gallate         | 234262353  | 227964159 | 226157618 | 215537273 | 224907841  | 226188221  | 224598121  | 216625553  | 216348039  | 225111361 | 226424530  | 229013213  |
| 213 | Traumatic acid                  | 139665767  | 135694618 | 133446396 | 137482898 | 145352595  | 148549872  | 148906782  | 147712128  | 145160934  | 143345362 | 140872450  | 141902552  |
| 214 | Leu-Thr                         | 215036447  | 216590223 | 205670955 | 209430704 | 214393979  | 217506912  | 211627733  | 225022594  | 212284049  | 205530624 | 203351580  | 206844218  |
| 215 | Benzyl primeveroside            | 10220559   | 9960007   | 9851810   | 10828993  | 9719807    | 10091437   | 11644886   | 9862364    | 11124561   | 9894097   | 10028557   | 10053692   |
| 216 | Quercetin 3-O-glucuronide       | 6703780    | 6447382   | 6262729   | 6190055   | 6168159    | 6499596    | 7207857    | 6861867    | 6756368    | 6536188   | 6440654    | 6538244    |
| 217 | Digalloyl-beta-D-glucose 3      | 282419688  | 267136439 | 268257344 | 287608333 | 295180413  | 300058827  | 340971410  | 297438025  | 307921523  | 283326193 | 287985636  | 284947466  |
| 218 | Niacinamide                     | 88357037   | 80290538  | 84259131  | 93771721  | 85099195   | 84509070   | 102349852  | 107951345  | 100228807  | 114969552 | 113208789  | 113503270  |

|     |                            |            |            |            |            |            |            |            |            |            |            |            |            |
|-----|----------------------------|------------|------------|------------|------------|------------|------------|------------|------------|------------|------------|------------|------------|
| 219 | N-Acetyl-L-phenylalanine   | 29316687   | 28290234   | 27506302   | 27085736   | 27761496   | 28922704   | 30501296   | 29563918   | 30941821   | 29026005   | 29494192   | 29368365   |
| 220 | Theobromine                | 1997387857 | 1976689957 | 1938119309 | 1993686037 | 1951853831 | 2008792330 | 2111688829 | 2154892563 | 2177232301 | 2070611575 | 2050878806 | 2037131321 |
| 221 | Indole-3-carboxaldehyde    | 152732274  | 154356919  | 146552847  | 142072197  | 149378395  | 146438747  | 152202558  | 146644515  | 146526295  | 148596055  | 149163777  | 146839079  |
| 222 | Quercetin diglucoside      | 5032583    | 4766382    | 4656772    | 5036811    | 5304036    | 5128342    | 5250554    | 5702831    | 4967681    | 5371117    | 5287059    | 5344336    |
| 223 | Rutin                      | 101467233  | 99764270   | 98131200   | 103461498  | 105929599  | 107711239  | 109084162  | 105828159  | 105224839  | 108924586  | 107760760  | 107277008  |
| 224 | Coumaroyl quinic acid 1    | 107845246  | 111578636  | 108014550  | 101156436  | 106762029  | 107474186  | 110374833  | 110666388  | 106571605  | 118836245  | 119148492  | 120576269  |
| 225 | L-Tryptophan               | 1344926886 | 1363041953 | 1327327029 | 1252988262 | 1290618603 | 1314267084 | 1312484871 | 1307899651 | 1245443408 | 1281919506 | 1286630981 | 1267885600 |
| 226 | O-caffeoylquinic acid      | 29661984   | 29091774   | 29089687   | 27900257   | 29116159   | 30670930   | 29200633   | 28611854   | 29664133   | 30343703   | 30798922   | 30577533   |
| 227 | Kaempferol-3-O-galactoside | 239439933  | 232103902  | 221498719  | 236921675  | 235005115  | 237306235  | 244848075  | 232618373  | 240896318  | 235916733  | 239324338  | 236811885  |
|     | isomer                     |            |            |            |            |            |            |            |            |            |            |            |            |
| 228 | Isoschaftoside isomer      | 276633906  | 270592089  | 261360435  | 242075911  | 251927120  | 259651367  | 232560175  | 224215592  | 218734516  | 232021522  | 228632912  | 230706736  |
| 229 | 5'-Methylthioadenosine     | 1195095383 | 1179688904 | 1129705009 | 1185163708 | 1143404282 | 1160781653 | 1218577540 | 1160670301 | 1162872948 | 1228619559 | 1221034254 | 1238651060 |
| 230 | Adenosine                  | 248031145  | 239766113  | 238422145  | 394246021  | 357070278  | 359190472  | 207347073  | 216921558  | 209802514  | 280425400  | 282015107  | 284347486  |
| 231 | Hydroxy-L-tryptophan       | 36335325   | 38825471   | 37066390   | 36583137   | 35371409   | 36339736   | 33253221   | 36165030   | 34876963   | 34249410   | 34375797   | 33915513   |
| 232 | Coumaroyl quinic acid 2    | 12744430   | 12959319   | 12203592   | 12265941   | 13582726   | 12932875   | 12653385   | 12899152   | 12629988   | 12418520   | 12574379   | 12448141   |
| 233 | Hydroxymethylglutaric acid | 49081938   | 48968168   | 48815474   | 45386965   | 53467761   | 47637479   | 48175327   | 49495573   | 48096195   | 48454773   | 48731401   | 49079480   |
| 234 | 4-O-Methylgallic acid      | 1184221470 | 1181459186 | 1085787575 | 1206335979 | 1203392490 | 1130040859 | 1401540442 | 1355907374 | 1362652824 | 1228418029 | 1221257109 | 1212951285 |
| 235 | Kaempferol                 | 149975559  | 147202678  | 149877404  | 190601351  | 193321836  | 199953989  | 225771558  | 211265688  | 213747643  | 184905662  | 186258786  | 187112671  |
| 236 | Epigallocatechin 3-gallate | 1738127128 | 1755565541 | 1685742033 | 1381737958 | 1402763097 | 1450477261 | 1295804334 | 1288067141 | 1283690138 | 1721420945 | 1725199899 | 1705965100 |
| 237 | Kaempferol-3-O-glucoside   | 542694522  | 523146322  | 517866227  | 514372517  | 546751372  | 559985666  | 578646103  | 556630369  | 561029196  | 555068859  | 561103724  | 560286571  |
| 238 | Phenylethyl primeveroside  | 7022379    | 7015251    | 6750928    | 6552573    | 6436363    | 6681887    | 7180180    | 7338923    | 7991598    | 6750463    | 6810729    | 6736338    |
| 239 | N-Alpha-acetyllysine       | 151359448  | 152481490  | 140477755  | 146237345  | 141607059  | 139932485  | 170486010  | 177148087  | 171795890  | 223597640  | 221185580  | 222183060  |
| 240 | Naringenin                 | 49855963   | 49155804   | 48044844   | 51214384   | 53146194   | 54008988   | 52892549   | 53674778   | 53623289   | 51895161   | 51395458   | 51869223   |
| 241 | Epicatechin 3-O-gallate    | 1041556792 | 1012572568 | 974477727  | 941983601  | 951573317  | 943910014  | 989948599  | 988258307  | 992482769  | 1029857284 | 1023430626 | 1033252951 |
| 242 | Pantothenic acid           | 43789265   | 44259855   | 43723052   | 42561505   | 44322140   | 45385012   | 44834555   | 44347389   | 44351782   | 42664652   | 43002052   | 43031146   |
| 243 | Phloretin 2'-O-glucuronide | 228290860  | 219153648  | 211104060  | 191943421  | 199693411  | 202575332  | 185981216  | 178622948  | 175984543  | 201618487  | 199940232  | 201457884  |

|     |                                                        |            |            |            |            |            |            |            |            |            |            |            |            |
|-----|--------------------------------------------------------|------------|------------|------------|------------|------------|------------|------------|------------|------------|------------|------------|------------|
| 244 | Glutaconic acid                                        | 153912972  | 148009878  | 150106057  | 138029297  | 150975361  | 145872502  | 131138850  | 132310305  | 125126440  | 124478102  | 125577694  | 125115264  |
| 245 | Epicatechin                                            | 356497302  | 346079350  | 334549026  | 300997337  | 292833665  | 304498585  | 304560905  | 304898435  | 296544126  | 349132448  | 347090669  | 350043278  |
| 246 | Luteolin                                               | 363390253  | 354405536  | 324445558  | 315557791  | 312506873  | 307718903  | 416751276  | 380285301  | 386030104  | 412513634  | 409181575  | 411343820  |
| 247 | Apigenin-6-C-arabinoside-8-C-glucoside(Isoschaftoside) | 472873884  | 459363351  | 434833523  | 468049352  | 475993314  | 485691303  | 563448936  | 562118991  | 540416455  | 589741632  | 591718553  | 587227422  |
| 248 | Theaflavin-3-gallate                                   | 287819202  | 284848354  | 267509188  | 269475952  | 267733557  | 275996556  | 271409283  | 271883201  | 268645249  | 274632571  | 274507214  | 273041285  |
| 249 | L-Malic acid                                           | 1401976817 | 1401040082 | 1400641081 | 1372211373 | 1422413199 | 1320789452 | 1361863318 | 1456607364 | 1351244091 | 1385836458 | 1385494704 | 1378209318 |
| 250 | Epiafzelechin 3-gallate                                | 182448945  | 178632154  | 177094850  | 186830010  | 189628650  | 192738799  | 201628069  | 192526531  | 196816739  | 189391625  | 189587668  | 190255025  |
| 251 | L-Cystine                                              | 31597467   | 29895151   | 29603718   | 29622837   | 32967828   | 30473448   | 33173245   | 29105293   | 30903146   | 30812043   | 30718899   | 30667624   |
| 252 | Coumaroyl quinic acid 5                                | 15406821   | 14965801   | 14551978   | 14434796   | 14937380   | 15331114   | 14892422   | 14880761   | 14531831   | 14783196   | 14768571   | 14736365   |
| 253 | Caffeoylshikimic acid                                  | 375890     | 413252     | 394597     | 365210     | 332883     | 349046.5   | 371042     | 375766     | 450137     | 400293     | 418666     | 409479.5   |
